# Supplementary material for: Lipid Variability and Risk of Cardiovascular Diseases and All-Cause Mortality: A Systematic Review and Meta-Analysis of Cohort Studies
Source: MDPI journal article supplement (doi:10.3390/nu14122450), 2022-06-13
Supplement: s1 [file s1]

## Supplementary Materials

### **Li et al. Lipid variability and risk of cardiovascular diseases and all-cause mortality: a systematic review and meta-analysis of cohort studies**

**Table S1.** Search strategy to identify studies reporting the associations of lipid variability with cardiovascular disease and mortality

**Table S2.** Summary of main metrics of LV

**Table S3.** Quality assessment for cohort studies conducted with the Newcastle Ottawa Scale (NOS)

**Table S4.** Summary effects and 95% *CI* using random-effects subgroup meta-analysis for the associations of TC variability (top vs. bottom quartiles) with CVDs

**Table S5.** Summary effects and 95% *CI* using random-effects subgroup meta-analysis for the associations of HDL-C variability (top vs. bottom quartiles) with CVDs

**Table S6.** Summary effects and 95% *CI* using random-effects subgroup meta-analysis for the associations of LDL-C variability (top vs. bottom quartiles) with CVDs

**Table S7.** Summary effects and 95% *CI* using random-effects subgroup meta-analysis for the associations of TG variability (top vs. bottom quartiles) with CVDs

**Table S8.** Summary effects and 95% *CI* using random-effects subgroup meta-analysis for the associations of TC variability (top vs. bottom quartiles) with all-cause mortality

**Figure S1.** Forest plots of standardized RRs for different types and metrics of TC variability (top vs. bottom quartile) with CVDs

**Figure S2.** Forest plots of standardized RRs for different types and metrics of HDL-C variability (top vs. bottom quartile) with CVDs

**Figure S3.** Forest plots of standardized RRs for different types and metrics of LDL-C variability (top vs. bottom quartile) with CVDs

**Figure S4.** Forest plots of standardized RRs for different types and metrics of TG variability (top vs. bottom quartile) with CVDs

**Figure S5.** Sensitivity analysis of standardized RRs for different types and metrics of LV (top vs. bottom quartile) and CVDs with excluding the articles counted on patients with hypertension or diabetes

**Figure S6.** Forest plots of standardized RRs for different types and metrics of TC variability (top vs. bottom quartile) and all-cause mortality

**Figure S7.** Forest plots of standardized RRs for different types and metrics of HDL-C variability (top vs. bottom quartile) and all-cause mortality

**Figure S8.** Sensitivity analysis of standardized RRs for different types and metrics of LV (top vs. bottom quartile) and all-cause mortality with excluding the articles counted on patients with hypertension or diabetes

**Figure S9.** Funnel plots of standardized RRs for different types and metrics of TC variability (top vs. bottom quartile) and CVDs

**Figure S10.** Funnel plots of standardized RRs for different types and metrics of HDL-C variability (top vs. bottom quartile) and CVDs

**Figure S11.** Funnel plots of standardized RRs for different types and metrics of LDL-C variability (top vs. bottom quartile) and CVDs

**Figure S12.** Funnel plots of standardized RRs for different types and metrics of TG variability (top vs. bottom quartile) and CVDs

**Figure S13.** Funnel plots of standardized RRs for different types and metrics of TC variability (top vs. bottom quartile) and all-cause mortality

**Table S1.** Search strategy to identify studies reporting the associations of lipid variability with cardiovascular disease and mortality

| Database | Search terms                                                                                                                                                                                                                                                                                                                                                                                                                                                                                                                                                                                                                                                                                                                                                                                                                                                                                                                                                                                                                                                                                                                                                                                                                                                                                                                                              |
|----------|-----------------------------------------------------------------------------------------------------------------------------------------------------------------------------------------------------------------------------------------------------------------------------------------------------------------------------------------------------------------------------------------------------------------------------------------------------------------------------------------------------------------------------------------------------------------------------------------------------------------------------------------------------------------------------------------------------------------------------------------------------------------------------------------------------------------------------------------------------------------------------------------------------------------------------------------------------------------------------------------------------------------------------------------------------------------------------------------------------------------------------------------------------------------------------------------------------------------------------------------------------------------------------------------------------------------------------------------------------------|
| PubMed   | #1 search (Lipids[Mesh] OR Cholesterol[Mesh] OR Total Cholesterol[Title/Abstract] OR TC[Title/Abstract] OR Cholesterol, HDL[Mesh] OR High-density Lipoprotein Cholesterol[Title/Abstract] OR HDL-C[Title/Abstract] OR HDL-Cholesterol[Title/Abstract] OR Cholesterol, LDL[Mesh] OR Low-density Lipoprotein Cholesterol[Title/Abstract] OR LDL-C[Title/Abstract] OR LDL-Cholesterol[Title/Abstract] OR Triglycerides[Mesh] OR TG[Title/Abstract])                                                                                                                                                                                                                                                                                                                                                                                                                                                                                                                                                                                                                                                                                                                                                                                                                                                                                                          |
|          | #2 search (Variabilit*[Title/Abstract] OR Variation*[Title/Abstract])                                                                                                                                                                                                                                                                                                                                                                                                                                                                                                                                                                                                                                                                                                                                                                                                                                                                                                                                                                                                                                                                                                                                                                                                                                                                                     |
|          | #3 search (#1 AND #2)                                                                                                                                                                                                                                                                                                                                                                                                                                                                                                                                                                                                                                                                                                                                                                                                                                                                                                                                                                                                                                                                                                                                                                                                                                                                                                                                     |
|          | #4 search (Cohort Studies[Mesh] OR Longitudinal Studies[Mesh] OR Follow-Up Studies[Mesh] OR Prospective Studies[Mesh] OR Cohort*[Title/Abstract] OR longitudinal*[Title/Abstract] OR follow-up*[Title/Abstract] OR prospective[Title/Abstract] OR inciden*[Title/Abstract])                                                                                                                                                                                                                                                                                                                                                                                                                                                                                                                                                                                                                                                                                                                                                                                                                                                                                                                                                                                                                                                                               |
|          | #5 search ((Cardiovascular diseases[Mesh] OR cardiovascular disease*[Title/Abstract] OR CVD[Title/Abstract] OR cardiocerebrovascular disease*[Title/Abstract] OR cardiovascular event*[Title/Abstract] OR heart disease*[Title/Abstract]) OR Stroke[Mesh] OR (Myocardial infarction[Mesh] OR MI[Title/Abstract] OR heart infarction[Title/Abstract]) OR (Myocardial infarction[Mesh] OR ischaemic heart disease*[Title/Abstract] OR ischemic heart disease*[Title/Abstract] OR IHD[Title/Abstract]) OR (Heart Failure[Mesh] OR cardiac failure[Title/Abstract]) OR (Coronary Artery Disease[Mesh] OR coronary artery disease*[Title/Abstract] OR CAD[Title/Abstract] OR coronary heart disease*[Title/Abstract] OR CHD[Title/Abstract]) OR (Cerebral Arterial Diseases[Mesh] OR Cerebrovascular Disorders[Mesh] OR Cerebrovascular Disorder*[Title/Abstract] OR cerebrovascular disease*[Title/Abstract] OR CBVD[Title/Abstract]) OR (Cerebral infarction[Mesh] OR cerebrovascular accident*[Title/Abstract] OR cerebrovascular attack*[Title/Abstract] OR CVA[Title/Abstract] OR cerebral arterial disease*[Title/Abstract]) OR (Peripheral Vascular Diseases[Mesh] OR Peripheral Arterial Disease[Mesh] OR peripheral vascular disease*[Title/Abstract] or peripheral arterial disease*[Title/Abstract] or PVD[Title/Abstract] or PAD[Title/Abstract])) |
|          | #6 search (Mortality[Mesh] OR Death[Mesh] OR Mortalit*[Title/Abstract] OR death*[Title/Abstract] OR fetal[Title/Abstract] OR fatalit*[Title/Abstract])                                                                                                                                                                                                                                                                                                                                                                                                                                                                                                                                                                                                                                                                                                                                                                                                                                                                                                                                                                                                                                                                                                                                                                                                    |
|          | #7 search (#5 OR #6)                                                                                                                                                                                                                                                                                                                                                                                                                                                                                                                                                                                                                                                                                                                                                                                                                                                                                                                                                                                                                                                                                                                                                                                                                                                                                                                                      |
|          | #8 search (#3 AND #4 AND #7)                                                                                                                                                                                                                                                                                                                                                                                                                                                                                                                                                                                                                                                                                                                                                                                                                                                                                                                                                                                                                                                                                                                                                                                                                                                                                                                              |
| Medline  | #1 exp Lipids/                                                                                                                                                                                                                                                                                                                                                                                                                                                                                                                                                                                                                                                                                                                                                                                                                                                                                                                                                                                                                                                                                                                                                                                                                                                                                                                                            |
|          | #2 exp Cholesterol/                                                                                                                                                                                                                                                                                                                                                                                                                                                                                                                                                                                                                                                                                                                                                                                                                                                                                                                                                                                                                                                                                                                                                                                                                                                                                                                                       |
|          | #3 (Cholesterol or Total Cholesterol or TC).ab,ti.                                                                                                                                                                                                                                                                                                                                                                                                                                                                                                                                                                                                                                                                                                                                                                                                                                                                                                                                                                                                                                                                                                                                                                                                                                                                                                        |
|          | #4 2 or 3                                                                                                                                                                                                                                                                                                                                                                                                                                                                                                                                                                                                                                                                                                                                                                                                                                                                                                                                                                                                                                                                                                                                                                                                                                                                                                                                                 |

| Database | Search terms                                                                                                         |
|----------|----------------------------------------------------------------------------------------------------------------------|
| #5       | exp Cholesterol, HDL/                                                                                                |
| #6       | (High-density Lipoprotein Cholesterol or HDL-C or HDL-Cholesterol).ab,ti.                                            |
| #7       | 5 or 6                                                                                                               |
| #8       | exp Cholesterol, LDL/                                                                                                |
| #9       | (Low-density Lipoprotein Cholesterol or LDL-C or LDL-Cholesterol).ab,ti.                                             |
| #10      | 8 or 9                                                                                                               |
| #11      | exp Triglycerides/                                                                                                   |
| #12      | (Triglyceride* OR TG).ab,ti.                                                                                         |
| #13      | 11 or 12                                                                                                             |
| #14      | (variability or variation*).ab,ti.                                                                                   |
| #15      | exp Cohort Studies/                                                                                                  |
| #16      | exp Longitudinal Studies/                                                                                            |
| #17      | exp Follow-Up Studies/                                                                                               |
| #18      | exp Prospective Studies/                                                                                             |
| #19      | (Cohort* or longitudinal* or follow-up* or prospective or inciden*).ab,ti.                                           |
| #20      | 1 or 4 or 7 or 10 or 13                                                                                              |
| #21      | 15 or 16 or 17 or 18 or 19                                                                                           |
| #22      | exp cardiovascular diseases/                                                                                         |
| #23      | exp heart diseases/                                                                                                  |
| #24      | (cardiovascular disease* or CVD or cardiocerebrovascular disease* or cardiovascular event* or heart disease*).ab,ti. |
| #25      | 22 or 23 or 24                                                                                                       |
| #26      | exp Stroke/                                                                                                          |
| #27      | exp myocardial infarction/                                                                                           |
| #28      | (myocardial infarction or MI or heart infarction).ab,ti.                                                             |
| #29      | 27 or 28                                                                                                             |
| #30      | exp Myocardial Ischemia/                                                                                             |
| #31      | (ischaemic heart disease* or ischemic heart disease* or IHD or myocardial ischaemia or myocardial ischemia).ab,ti.   |
| #32      | 30 or 31                                                                                                             |
| #33      | exp Heart Failure/                                                                                                   |
| #34      | (heart failure or cardiac failure).ab,ti.                                                                            |
| #35      | 33 or 34                                                                                                             |
| #36      | exp Coronary Artery Disease/                                                                                         |
| #37      | (coronary artery disease* or CAD or coronary heart disease* or CHD).ab,ti.                                           |
| #38      | 36 or 37                                                                                                             |
| #39      | exp Cerebrovascular Disorders/                                                                                       |
| #40      | exp Cerebral Arterial Diseases/                                                                                      |

| Database | Search terms                                                                                             |
|----------|----------------------------------------------------------------------------------------------------------|
|          | #41 (Cerebrovascular Disorder* OR cerebrovascular disease* OR CBVD OR Cerebral arterial disease*).ab,ti. |
|          | #42 39 or 40 or 41                                                                                       |
|          | #43 (Cerebrovascular accident* OR cerebrovascular attack* OR CVA).ab,ti.                                 |
|          | #44 exp Cerebral Infarction/                                                                             |
|          | #45 exp Peripheral Vascular Diseases/                                                                    |
|          | #46 exp Peripheral Arterial Disease/                                                                     |
|          | #47 (peripheral vascular disease* or peripheral arterial disease* or PVD or PAD).ab,ti.                  |
|          | #48 45 or 46 or 47                                                                                       |
|          | #49 25 or 26 or 29 or 32 or 35 or 38 or 42 or 43 or 44 or 48                                             |
|          | #50 exp Mortality/                                                                                       |
|          | #51 exp Death/                                                                                           |
|          | #52 (Mortalit* OR death* OR fetal OR fatalit*).ab,ti.                                                    |
|          | #53 50 or 51 or 52                                                                                       |
|          | #54 49 or 53                                                                                             |
|          | #55 14 and 20                                                                                            |
|          | #56 21 and 54 and 55                                                                                     |
|          | #57 limit 56 to (english language and medline)                                                           |
| EMBASE   | #1 'Lipid blood level'/exp                                                                               |
|          | #2 'Lipid*':ab,ti OR 'Lipid blood level':ab,ti                                                           |
|          | #3 #1 OR #2                                                                                              |
|          | #4 'Cholesterol blood level'/exp                                                                         |
|          | #5 'Total Cholesterol':ab,ti OR ' TC':ab,ti                                                              |
|          | #6 #4 OR #5                                                                                              |
|          | #7 'High density lipoprotein cholesterol'/exp                                                            |
|          | #8 'High-density Lipoprotein Cholesterol':ab,ti OR 'HDL-C':ab,ti OR 'HDL-Cholesterol':ab,ti              |
|          | #9 #7 OR #8                                                                                              |
|          | #10 'Low density lipoprotein cholesterol'/exp                                                            |
|          | #11 'Low-density Lipoprotein Cholesterol':ab,ti OR 'LDL-C':ab,ti OR 'LDL-Cholesterol':ab,ti              |
|          | #12 #10 OR #11                                                                                           |
|          | #13 'Triacylglycerol blood level'/exp                                                                    |
|          | #14 'Triglyceride*':ab,ti OR 'TG':ab,ti                                                                  |
|          | #15 #13 OR #14                                                                                           |
|          | #16 'variabilit*':ab,ti OR 'variation*':ab,ti                                                            |
|          | #17 'Longitudinal Study'/exp                                                                             |
|          | #18 'Prospective Study'/exp                                                                              |
|          | #19 'Cohort*':ab,ti OR 'longitudinal*':ab,ti OR 'follow-up*':ab,ti OR                                    |

| Database | Search terms                                                                                                                                        |
|----------|-----------------------------------------------------------------------------------------------------------------------------------------------------|
|          | 'prospective':ab,ti OR 'inciden*':ab,ti                                                                                                             |
| #20      | #3 OR #6 OR #9 OR #12 OR #15                                                                                                                        |
| #21      | #17 OR #18 OR #19                                                                                                                                   |
| #22      | #16 AND #20                                                                                                                                         |
| #23      | 'cardiovascular disease'/exp                                                                                                                        |
| #24      | 'heart disease'/exp                                                                                                                                 |
| #25      | 'cardiovascular disease*':ab,ti OR 'CVD':ab,ti OR 'cardiocerebrovascular disease*':ab,ti OR 'cardiovascular event*':ab,ti OR 'heart disease*':ab,ti |
| #26      | #23 OR #24 OR #25                                                                                                                                   |
| #27      | 'stroke*':ab,ti                                                                                                                                     |
| #28      | 'heart infarction'/exp                                                                                                                              |
| #29      | 'myocardial infarction':ab,ti OR 'MI':ab,ti OR 'heart infarction*':ab,ti                                                                            |
| #30      | #28 OR #29                                                                                                                                          |
| #31      | 'ischemic heart disease'/exp                                                                                                                        |
| #32      | 'ischaemic heart disease*':ab,ti OR 'ischemic heart disease*':ab,ti OR 'IHD':ab,ti OR 'myocardial ischaemia':ab,ti OR 'myocardial ischemia':ab,ti   |
| #33      | #31 OR #32                                                                                                                                          |
| #34      | 'heart failure'/exp                                                                                                                                 |
| #35      | 'heart failure':ab,ti OR 'cardiac failure':ab,ti                                                                                                    |
| #36      | #34 OR #35                                                                                                                                          |
| #37      | 'coronary artery disease'/exp                                                                                                                       |
| #38      | 'coronary artery disease*':ab,ti OR 'CAD':ab,ti OR 'coronary heart disease*':ab,ti OR 'CHD':ab,ti                                                   |
| #39      | #37 OR #38                                                                                                                                          |
| #40      | 'cerebrovascular disease'/exp                                                                                                                       |
| #41      | 'Cerebrovascular Disorder*':ab,ti OR 'cerebrovascular disease*':ab,ti OR 'CBVD':ab,ti OR 'cerebral arterial disease*':ab,ti                         |
| #42      | #40 OR #41                                                                                                                                          |
| #43      | 'cerebrovascular accident'/exp                                                                                                                      |
| #44      | 'Cerebrovascular accident*':ab,ti OR 'cerebrovascular attack*':ab,ti OR 'CVA':ab,ti                                                                 |
| #45      | #43 OR #44                                                                                                                                          |
| #46      | 'cerebral infarction':ab,ti                                                                                                                         |
| #47      | 'peripheral vascular disease'/exp                                                                                                                   |
| #48      | 'peripheral vascular disease*':ab,ti OR 'peripheral arterial disease*':ab,ti OR 'PVD':ab,ti OR 'PAD':ab,ti                                          |
| #49      | #46 OR #47 OR #48                                                                                                                                   |
| #50      | 'mortality'/exp                                                                                                                                     |
| #51      | 'death'/exp                                                                                                                                         |
| #52      | 'fatality'/exp                                                                                                                                      |
| #53      | 'Mortalit*':ab,ti OR 'death*':ab,ti OR 'fetal':ab,ti OR 'fatalit*':ab,ti                                                                            |

| Database | Search terms                                                                                               |
|----------|------------------------------------------------------------------------------------------------------------|
| #54      | #50 OR #51 OR #52 OR #53                                                                                   |
| #55      | #26 OR #27 OR #30 OR #33 OR #36 OR #39 OR #42 OR #45 OR #46 OR #49                                         |
| #56      | #54 OR #55                                                                                                 |
| #57      | #21 AND #22 AND #56                                                                                        |
| #58      | #57 AND [embase]/lim AND ([article]/lim OR [article in press]/lim OR [short survey]/lim) AND [english]/lim |

---

Note: the above databases were searched in 14 Dec 2021 before manuscript submission.

**Table S2.** Summary of main metrics of LV

| LV metrics   | Definition                                                                                 | Calculation                                                                                                                                                                                                                 |
|--------------|--------------------------------------------------------------------------------------------|-----------------------------------------------------------------------------------------------------------------------------------------------------------------------------------------------------------------------------|
| <b>TC</b>    |                                                                                            |                                                                                                                                                                                                                             |
| TC-CV        | Coefficient of variation of TC                                                             | $CV = \frac{SD}{mean}$                                                                                                                                                                                                      |
| TC-SD        | Standard deviation of TC                                                                   | $SD = \sqrt{\frac{\sum  x - \mu ^2}{n}}$ ( $x$ : value in the data set; $\mu$ : mean; $n$ : the number of measurements)                                                                                                     |
| TC-VIM       | Variation independent of mean of TC                                                        | $VIM = \frac{SD}{mean^\beta}$ ( $\beta$ : regression coefficient based on the natural logarithm of SD over the natural logarithm of the mean)                                                                               |
| TC-ARV       | Average real variability of TC                                                             | $ARV = \frac{1}{n-1} \sum_{i=1}^{n-1}  Value_{i+1} - Value_i $ ( $n$ : number of measurements)                                                                                                                              |
| TC-ASV       | Average successive variability of TC                                                       | $ASV = \frac{1}{n} \sum  Value_i - Value_{i+1} $ ( $n$ : number of measurements)                                                                                                                                            |
| TC-RMSE      | Root Mean Square Error of TC                                                               | $RMSE = \sqrt{\frac{1}{n} \sum_{i=1}^n (\hat{y}_i - y_i)^2}$ ( $\hat{y}_i$ : predicted value; $y_i$ : true value)                                                                                                           |
| TC-SDR       | Standard deviation of the residuals from the linear regression of the lipid measures of TC | 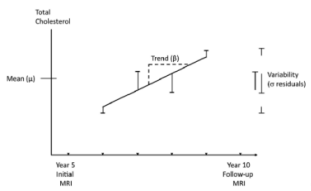 <p>(<math>\mu</math>: mean; <math>\beta</math>: intraindividual trend over time, or slope; <math>\sigma</math>: standard deviation)</p> |
| <b>HDL-C</b> |                                                                                            |                                                                                                                                                                                                                             |
| HDL-C-CV     | Coefficient of variation of HDL-C                                                          | $CV = \frac{SD}{mean}$                                                                                                                                                                                                      |
| HDL-C-SD     | Standard deviation of HDL-C                                                                | $SD = \sqrt{\frac{\sum  x - \mu ^2}{n}}$ ( $x$ : value in the data set; $\mu$ : mean; $n$ : the number of measurements)                                                                                                     |
| HDL-C-VIM    | Variation independent of mean of HDL-C                                                     | $VIM = \frac{SD}{mean^\beta}$ ( $\beta$ : regression coefficient based on the natural logarithm of SD over the natural logarithm of the mean)                                                                               |
| HDL-C-ARV    | Average real variability of HDL-C                                                          | $ARV = \frac{1}{n-1} \sum_{i=1}^{n-1}  Value_{i+1} - Value_i $ ( $n$ : number of measurements)                                                                                                                              |
| <b>LDL-C</b> |                                                                                            |                                                                                                                                                                                                                             |
| LDL-C-CV     | Coefficient of variation of LDL-C                                                          | $CV = \frac{SD}{mean}$                                                                                                                                                                                                      |



|           |                                        |                                                                                                                                               |
|-----------|----------------------------------------|-----------------------------------------------------------------------------------------------------------------------------------------------|
| LDL-C-SD  | Standard deviation of LDL-C            | $SD = \sqrt{\frac{\sum  x - \mu ^2}{n}}$ ( $x$ : value in the data set; $\mu$ : mean; $n$ : the number of measurements)                       |
| LDL-C-VIM | Variation independent of mean of LDL-C | $VIM = \frac{SD}{mean^\beta}$ ( $\beta$ : regression coefficient based on the natural logarithm of SD over the natural logarithm of the mean) |
| LDL-C-ARV | Average real variability of LDL-C      | $ARV = \frac{1}{n-1} \sum_{i=1}^{n-1}  Value_{i+1} - Value_i $ ( $n$ : number of measurements)                                                |
| <b>TG</b> |                                        |                                                                                                                                               |
| TG-CV     | Coefficient of variation of TG         | $CV = \frac{SD}{mean}$                                                                                                                        |
| TG-SD     | Standard deviation of TG               | $SD = \sqrt{\frac{\sum  x - \mu ^2}{n}}$ ( $x$ : value in the data set; $\mu$ : mean; $n$ : the number of measurements)                       |
| TG-VIM    | Variation independent of mean of TG    | $VIM = \frac{SD}{mean^\beta}$ ( $\beta$ : regression coefficient based on the natural logarithm of SD over the natural logarithm of the mean) |
| TG-ARV    | Average real variability of TG         | $ARV = \frac{1}{n-1} \sum_{i=1}^{n-1}  Value_{i+1} - Value_i $ ( $n$ : number of measurements)                                                |

Notes: LV, lipid variability; TC, total cholesterol; HDL-C, high-density lipoprotein cholesterol; LDL-C, low-density lipoprotein cholesterol; TG, triglycerides.

**Table S3.** Quality assessment for cohort studies conducted with the Newcastle Ottawa Scale (NOS)

| Publications             | Selection<br>☆☆☆☆/★★★★                              |                                                  |                                 |                                                                                                    | Comparability<br>☆☆/★★                                                                                       | Outcome<br>☆☆☆/★★★★      |                                                                   |                                              | Overall stars | Quality assessment |
|--------------------------|-----------------------------------------------------|--------------------------------------------------|---------------------------------|----------------------------------------------------------------------------------------------------|--------------------------------------------------------------------------------------------------------------|--------------------------|-------------------------------------------------------------------|----------------------------------------------|---------------|--------------------|
|                          | Representative-<br>ness of the<br>exposed<br>cohort | Selection<br>of the<br>non-<br>exposed<br>cohort | Ascertainment<br>of<br>exposure | Demonstration<br>that outcome<br>of interest<br>was not<br>present at<br>the start of<br>the study | Comparability<br>of cohorts<br>on the basis<br>of the design<br>or analysis<br>controlled<br>for confounders | Assessment<br>of outcome | Was<br>follow-up<br>long<br>enough<br>for<br>outcomes<br>to occur | Adequacy<br>of<br>follow-up<br>of<br>cohorts |               |                    |
| Kreger et al (1994)[1]   | ★                                                   | ★                                                | ★                               | ★                                                                                                  | ☆☆                                                                                                           | ★                        | ★                                                                 | ★                                            | 7/9           | Good quality       |
| Kim et al (2017)[2]      | ★                                                   | ★                                                | ★                               | ★                                                                                                  | ★★                                                                                                           | ★                        | ★                                                                 | ☆                                            | 8/9           | Good quality       |
| Kwon et al (2019)[3]     | ★                                                   | ★                                                | ★                               | ★                                                                                                  | ★★                                                                                                           | ★                        | ★                                                                 | ☆                                            | 7/9           | Good quality       |
| Zhu et al (2019)[4]      | ★                                                   | ★                                                | ★                               | ★                                                                                                  | ★★                                                                                                           | ★                        | ☆                                                                 | ☆                                            | 6/9           | Fair quality       |
| Lee et al (2019)[5]      | ★                                                   | ★                                                | ★                               | ★                                                                                                  | ★★                                                                                                           | ★                        | ★                                                                 | ☆                                            | 7/9           | Good quality       |
| Liu et al (2020)[6]      | ★                                                   | ★                                                | ★                               | ★                                                                                                  | ★★                                                                                                           | ★                        | ★                                                                 | ★                                            | 9/9           | Good quality       |
| Han et al (2020)[7]      | ★                                                   | ★                                                | ★                               | ★                                                                                                  | ★★                                                                                                           | ★                        | ★                                                                 | ☆                                            | 7/9           | Good quality       |
| Kalani et al (2020)[8]   | ☆                                                   | ★                                                | ★                               | ★                                                                                                  | ★★                                                                                                           | ★                        | ★                                                                 | ★                                            | 7/9           | Good quality       |
| Wang et al (2020)[9]     | ★                                                   | ★                                                | ★                               | ★                                                                                                  | ★★                                                                                                           | ★                        | ★                                                                 | ★                                            | 8/9           | Good quality       |
| Wan, et al. (2020)[10]   | ☆                                                   | ★                                                | ★                               | ★                                                                                                  | ★★                                                                                                           | ★                        | ★                                                                 | ☆                                            | 7/9           | Good quality       |
| Huang, et al. (2021)[11] | ☆                                                   | ★                                                | ★                               | ★                                                                                                  | ★★                                                                                                           | ★                        | ☆                                                                 | ☆                                            | 5/9           | Fair quality       |

Note: (a) good quality if NOS ≥ 7 stars, (b) fair quality if NOS 4-6 stars, and (c) poor quality if NOS ≤ 4 stars.

**Table S4.** Summary effects and 95% CI using random-effects subgroup meta-analysis for the associations of TC variability (top vs. bottom quartile) with CVDs

| Characteristic<br>s of studies<br>and<br>populations | Numb<br>er of<br>Data<br>Points | SRR<br>(95% CI)     | I <sup>2</sup><br>(%) | <i>p</i> value |                                | Numb<br>er of<br>Data<br>Points | SRR<br>(95% CI)     | I <sup>2</sup><br>(%) | <i>p</i> value |                                | Numb<br>er of<br>Data<br>Points | SRR<br>(95% CI)     | I <sup>2</sup><br>(%) | <i>p</i> value |                                |
|------------------------------------------------------|---------------------------------|---------------------|-----------------------|----------------|--------------------------------|---------------------------------|---------------------|-----------------------|----------------|--------------------------------|---------------------------------|---------------------|-----------------------|----------------|--------------------------------|
|                                                      |                                 |                     |                       | <i>Q</i> test  | Subg<br>roup<br>diffe<br>rence |                                 |                     |                       | <i>Q</i> test  | Subg<br>roup<br>diffe<br>rence |                                 |                     |                       | <i>Q</i> test  | Subg<br>roup<br>diffe<br>rence |
|                                                      |                                 |                     |                       |                |                                |                                 |                     |                       |                |                                |                                 |                     |                       |                |                                |
| TC-CV                                                |                                 |                     |                       |                | TC-SD                          |                                 |                     |                       |                | TC-VIM                         |                                 |                     |                       |                |                                |
| Global analysis                                      | 7                               | 1.29<br>(1.15,1.45) |                       |                |                                | 7                               | 1.28<br>(1.15,1.43) |                       |                |                                | 7                               | 1.26<br>(1.13,1.41) |                       |                |                                |
| Subtypes of CVDs                                     |                                 |                     |                       |                | 0.974                          | 0.822                           |                     |                       |                |                                | 0.969                           |                     |                       |                |                                |
| MI                                                   | 2                               | 1.39<br>(1.03,1.87) | 76.3                  | 0.040          |                                | 2                               | 1.35<br>(1.03,1.77) | 79.7                  | 0.007          |                                | 2                               | 1.39<br>(1.08,1.79) | 67.3                  | 0.080          |                                |
| Stroke                                               | 3                               | 1.56<br>(1.07,2.28) | 90.7                  | 0.001          |                                | 3                               | 1.59<br>(1.12,2.27) | 88.8                  | <0.001         |                                | 3                               | 1.49<br>(1.06,2.10) | 88.3                  | <0.001         |                                |
| AF                                                   | 1                               | 1.10<br>(1.06,1.13) | /                     | /              |                                | 1                               | 1.09<br>(1.06,1.13) | /                     | /              |                                | 1                               | 1.08<br>(1.04,1.12) | /                     | /              |                                |
| HF                                                   | 1                               | 1.17<br>(1.13,1.22) | /                     | /              |                                | 1                               | 1.18<br>(1.13,1.23) | /                     | /              |                                | 1                               | 1.17<br>(1.12,1.22) | /                     | /              |                                |
| Gender <sup>a</sup>                                  |                                 |                     |                       |                | 0.187                          | 0.093                           |                     |                       |                |                                | 0.035                           |                     |                       |                |                                |
| Male                                                 | 4                               | 1.08<br>(1.05,1.11) | 54.2                  | 0.088          |                                | 3                               | 1.09<br>(1.07,1.10) | 0.0                   | 0.557          |                                | 3                               | 1.08<br>(1.07,1.10) | 0.0                   | 0.513          |                                |
| Female                                               | 4                               | 1.09<br>(0.99,1.19) | 89.5                  | <0.001         |                                | 3                               | 1.06<br>(1.03,1.08) | 0.0                   | 0.942          |                                | 3                               | 1.05<br>(1.01,1.09) | 0.0                   | 0.924          |                                |

| Characteristic<br>s of studies<br>and<br>populations | Numb<br>er of<br>Data<br>Points | SRR<br>(95% CI)     | I <sup>2</sup><br>(%) | p value |                                | Numb<br>er of<br>Data<br>Points | SRR<br>(95% CI) | I <sup>2</sup><br>(%) | p value |                                | Numb<br>er of<br>Data<br>Points | SRR<br>(95% CI) | I <sup>2</sup><br>(%) | p value |                                |
|------------------------------------------------------|---------------------------------|---------------------|-----------------------|---------|--------------------------------|---------------------------------|-----------------|-----------------------|---------|--------------------------------|---------------------------------|-----------------|-----------------------|---------|--------------------------------|
|                                                      |                                 |                     |                       | Q test  | Subg<br>roup<br>diffe<br>rence |                                 |                 |                       | Q test  | Subg<br>roup<br>diffe<br>rence |                                 |                 |                       | Q test  | Subg<br>roup<br>diffe<br>rence |
|                                                      |                                 |                     |                       |         |                                |                                 |                 |                       |         |                                |                                 |                 |                       |         |                                |
|                                                      |                                 |                     |                       |         |                                |                                 |                 |                       |         |                                |                                 |                 |                       |         |                                |
| TC-CV                                                |                                 |                     |                       | TC-SD   |                                |                                 |                 | TC-VIM                |         |                                |                                 |                 |                       |         |                                |
| Adjusted for mean lipid level                        |                                 |                     |                       | 0.003   |                                |                                 |                 | 0.001                 |         |                                |                                 | 0.002           |                       |         |                                |
| Yes                                                  | 6                               | 1.25<br>(1.12,1.40) | 92.3                  | <0.001  | 6                              | 1.24<br>(1.13,1.37)             | 89.8            | <0.001                | 6       | 1.23<br>(1.11,1.36)            | 90.7                            | <0.001          |                       |         |                                |
| No                                                   | 1                               | 3.83<br>(2.03,7.25) | /                     | /       | 1                              | 4.43<br>(2.29,8.56)             | /               | /                     | 1       | 3.87<br>(2.04,7.32)            | /                               | /               |                       |         |                                |
| Adjusted for lipid-lowering medication               |                                 |                     |                       | 0.216   |                                |                                 |                 | <0.001                |         |                                |                                 | <0.001          |                       |         |                                |
| Yes                                                  | 5                               | 1.43<br>(1.17,1.75) | 85.6                  | <0.001  | 4                              | 1.52<br>(1.23,1.86)             | 78.9            | 0.003                 | 4       | 1.49<br>(1.23,1.81)            | 77.9                            | 0.004           |                       |         |                                |
| No                                                   | 2                               | 1.13<br>(1.06,1.21) | 84.5                  | 0.011   | 3                              | 1.13<br>(1.07,1.21)             | 72.7            | 0.026                 | 3       | 1.12<br>(1.04,1.19)            | 76.0                            | 0.016           |                       |         |                                |

Note: The variables used for subgroup meta-analysis included: study design, subtypes of CVDs, gender (male or female), whether adjusting for mean lipid level or not, whether adjusting for lipid-lowering medication or not, whether adjusting for hypertension or not, whether adjusting for diabetes or not, whether adjusting for BMI or not, and whether adjusting for smoking or not. All studies of TC-CV, TC-SD and TC-VIM with CVDs were adjusted for hypertension, diabetes, BMI and smoking (data not shown).

SRR, summary relative risk; CI, confidence interval; CVDs, cardiovascular diseases; TC, total cholesterol; CV, coefficient of variation; SD, standard deviation; VIM, variation independent of mean; MI, myocardial infarction; AF, atrial fibrillation; HF, heart failure; <sup>a</sup>Three studies have explored the relationships between TC-CV, TC-SD, TC-VIM and CVDs in males and females.

**Table S5.** Summary effects and 95% CI using random-effects subgroup meta-analysis for the associations of HDL-C variability (top vs. bottom quartile) with CVDs

| Characteristics of studies and populations | Number of Data Points | SRR (95% CI)     | I <sup>2</sup> (%) | p value  |                     | Number of Data Points | SRR (95% CI) | I <sup>2</sup> (%) | p value |                     | Number of Data Points | SRR (95% CI) | I <sup>2</sup> (%) | p value |                     |
|--------------------------------------------|-----------------------|------------------|--------------------|----------|---------------------|-----------------------|--------------|--------------------|---------|---------------------|-----------------------|--------------|--------------------|---------|---------------------|
|                                            |                       |                  |                    | Q test   | Subgroup difference |                       |              |                    | Q test  | Subgroup difference |                       |              |                    | Q test  | Subgroup difference |
|                                            |                       |                  |                    |          |                     |                       |              |                    |         |                     |                       |              |                    |         |                     |
| HDL-C-CV                                   |                       |                  |                    | HDL-C-SD |                     |                       |              | HDL-C-VIM          |         |                     |                       |              |                    |         |                     |
| Global analysis                            | 6                     | 1.11 (1.07,1.15) |                    |          | 4                   | 1.18 (1.02,1.38)      |              |                    |         | 6                   | 1.18 (1.09,1.27)      |              |                    |         |                     |
| Subtypes of CVDs                           |                       |                  |                    |          | 0.636               |                       |              |                    |         | 0.613               |                       |              |                    | 0.389   |                     |
| MI                                         | 2                     | 1.28 (0.94,1.75) | 79.1               | 0.029    | 1                   | 1.46 (1.08,1.97)      | /            | 0.007              |         | 2                   | 1.26 (1.23,1.30)      | 0.0          | 0.080              |         |                     |
| Stroke                                     | 3                     | 1.11 (1.09,1.14) | 0.0                | 0.557    | 2                   | 1.22 (1.04,1.44)      | 0.0          | <0.001             |         | 3                   | 1.15 (1.10,1.19)      | 4.4          | <0.001             |         |                     |
| AF                                         | 1                     | 1.06 (1.03,1.10) | /                  | /        | 1                   | 1.06 (1.02,1.10)      | /            | /                  |         | 1                   | 1.07 (1.03,1.11)      | /            | /                  |         |                     |
| Gender <sup>a</sup>                        |                       |                  |                    |          | 0.134               |                       |              |                    |         | /                   |                       |              |                    | /       |                     |
| Male                                       | 3                     | 1.08 (1.06,1.09) | 38.1               | 0.199    | 1                   | 1.04 (1.00,1.08)      | /            | /                  |         | 1                   | 1.06 (1.02,1.10)      | /            | /                  |         |                     |
| Female                                     | 3                     | 1.10 (1.06,1.14) | 75.2               | 0.018    | 1                   | 1.12 (1.04,1.20)      | /            | /                  |         | 1                   | 1.10 (1.02,1.18)      | /            | /                  |         |                     |
| Adjusted for mean lipid level              |                       |                  |                    |          | 0.020               |                       |              |                    |         | 0.334               |                       |              |                    | 0.349   |                     |

| Characteristics of studies and populations | Number of Data Points | SRR<br>(95% CI)     | I <sup>2</sup><br>(%) | <i>p</i> value |                     | Number of Data Points | SRR<br>(95% CI) | I <sup>2</sup><br>(%) | <i>p</i> value |                     | Number of Data Points | SRR<br>(95% CI) | I <sup>2</sup><br>(%) | <i>p</i> value |                     |
|--------------------------------------------|-----------------------|---------------------|-----------------------|----------------|---------------------|-----------------------|-----------------|-----------------------|----------------|---------------------|-----------------------|-----------------|-----------------------|----------------|---------------------|
|                                            |                       |                     |                       | <i>Q</i> test  | Subgroup difference |                       |                 |                       | <i>Q</i> test  | Subgroup difference |                       |                 |                       | <i>Q</i> test  | Subgroup difference |
|                                            |                       |                     |                       |                |                     |                       |                 |                       |                |                     |                       |                 |                       |                |                     |
|                                            |                       |                     |                       |                |                     |                       |                 |                       |                |                     |                       |                 |                       |                |                     |
| HDL-C-CV                                   |                       |                     |                       | HDL-C-SD       |                     |                       |                 | HDL-C-VIM             |                |                     |                       |                 |                       |                |                     |
| Yes                                        | 3                     | 1.19<br>(1.00,1.42) | 75.6                  | 0.017          | 1                   | 1.42<br>(0.80,2.52)   | /               | /                     | 3              | 1.15<br>(1.01,1.30) | 56.2                  | 0.102           |                       |                |                     |
| No                                         | 3                     | 1.12<br>(1.10,1.14) | 0.0                   | 0.443          | 3                   | 1.17<br>(1.00,1.38)   | 69.6            | 0.037                 | 3              | 1.21<br>(1.10,1.33) | 93.8                  | <0.001          |                       |                |                     |
| Adjusted for lipid-lowering medication     |                       |                     |                       |                | 0.004               | 0.023                 |                 |                       |                |                     | 0.132                 |                 |                       |                |                     |
| Yes                                        | 5                     | 1.13<br>(1.09,1.17) | 43.9                  | 0.129          | 2                   | 1.45<br>(1.11,1.89)   | 0.0             | 0.935                 | 4              | 1.22<br>(1.11,1.34) | 90.9                  | <0.001          |                       |                |                     |
| No                                         | 1                     | 1.06<br>(1.03,1.10) | /                     | /              | 2                   | 1.10<br>(0.98,1.24)   | 57.6            | 0.125                 | 2              | 1.11<br>(0.99,1.23) | 51.5                  | 0.151           |                       |                |                     |

Note: The variables used for subgroup meta-analysis included: study design, subtypes of CVDs, gender (male or female), whether adjusting for mean lipid level or not, whether adjusting for lipid-lowering medication or not, whether adjusting for hypertension or not, whether adjusting for diabetes or not, whether adjusting for BMI or not, and whether adjusting for smoking or not. All studies of HDL-C-CV, HDL-C-SD and HDL-C-VIM with CVDs were adjusted for hypertension, diabetes, BMI and smoking (data not shown).

SRR, summary relative risk; CI, confidence interval; CVDs, cardiovascular diseases; HDL-C, high-density lipoprotein cholesterol; CV, coefficient of variation; SD, standard deviation; VIM, variation independent of mean; MI, myocardial infarction; AF, atrial fibrillation; <sup>a</sup>Two studies have explored the relationship between HDL-C-CV and CVDs in males and females; One study have explored the relationship between HDL-C-SD and CVDs in males and females; One study have explored the relationship between HDL-C-VIM and CVDs in males and females.

**Table S6.** Summary effects and 95% CI using random-effects subgroup meta-analysis for the associations of LDL-C variability (top vs. bottom quartile) with CVDs

| Characteristics of studies and populations | Number of Data Points | SRR (95% CI)     | I <sup>2</sup> (%) | p value |                     | Number of Data Points | SRR (95% CI)     | I <sup>2</sup> (%) | p value |                     | Number of Data Points | SRR (95% CI)     | I <sup>2</sup> (%) | p value |                     |  |  |       |  |
|--------------------------------------------|-----------------------|------------------|--------------------|---------|---------------------|-----------------------|------------------|--------------------|---------|---------------------|-----------------------|------------------|--------------------|---------|---------------------|--|--|-------|--|
|                                            |                       |                  |                    | Q test  | Subgroup difference |                       |                  |                    | Q test  | Subgroup difference |                       |                  |                    | Q test  | Subgroup difference |  |  |       |  |
|                                            |                       |                  |                    |         |                     |                       |                  |                    |         |                     |                       |                  |                    |         |                     |  |  |       |  |
| LDL-C-CV                                   |                       |                  |                    |         |                     | LDL-C-SD              |                  |                    |         |                     |                       | LDL-C-VIM        |                    |         |                     |  |  |       |  |
| Global analysis                            | 4                     | 1.18 (1.02,1.38) |                    |         |                     | 5                     | 1.09 (1.02,1.17) |                    |         |                     | 4                     | 1.16 (1.02,1.32) |                    |         |                     |  |  |       |  |
| Subtypes of CVDs                           |                       |                  |                    |         |                     | 0.890                 |                  |                    |         |                     |                       | 0.038            |                    |         |                     |  |  | 0.701 |  |
| MI                                         | 1                     | 1.34 (1.01,1.78) | /                  | /       |                     | 1                     | 1.25 (0.93,1.69) | /                  | /       |                     | 1                     | 1.22 (0.91,1.63) | /                  | /       |                     |  |  |       |  |
| Stroke                                     | 2                     | 1.35 (0.78,2.31) | 72.9               | 0.055   |                     | 2                     | 1.10 (0.93,1.30) | 82.1               | 0.018   |                     | 2                     | 1.47 (0.78,2.75) | 79.5               | 0.027   |                     |  |  |       |  |
| AF                                         | 1                     | 1.06 (1.03,1.10) | /                  | /       |                     | 1                     | 1.03 (1.00,1.07) | /                  | /       |                     | 1                     | 1.10 (1.06,1.15) | /                  | /       |                     |  |  |       |  |
| Gender <sup>a</sup>                        |                       |                  |                    |         |                     | 0.873                 |                  |                    |         |                     |                       | 0.998            |                    |         |                     |  |  | 0.917 |  |
| Male                                       | 2                     | 1.09 (0.90,1.31) | 9.9                | 0.292   |                     | 2                     | 1.35 (0.67,2.72) | 71.4               | 0.062   |                     | 2                     | 1.24 (0.80,1.93) | 41.0               | 0.193   |                     |  |  |       |  |
| Female                                     | 2                     | 1.54 (0.62,3.83) | 81.2               | 0.021   |                     | 2                     | 1.26 (0.72,2.22) | 64.8               | 0.092/  |                     | 2                     | 1.51 (0.69,3.32) | 77.5               | 0.035   |                     |  |  |       |  |
| Adjusted for mean lipid level              |                       |                  |                    |         |                     | 0.039                 |                  |                    |         |                     |                       | 0.011            |                    |         |                     |  |  | 0.019 |  |



| Characteristics of studies and populations | Number of Data Points | SRR (95% CI)        | I <sup>2</sup> (%) | <i>p</i> value |                     | Number of Data Points | SRR (95% CI) | I <sup>2</sup> (%) | <i>p</i> value |                     | Number of Data Points | SRR (95% CI) | I <sup>2</sup> (%) | <i>p</i> value |                     |
|--------------------------------------------|-----------------------|---------------------|--------------------|----------------|---------------------|-----------------------|--------------|--------------------|----------------|---------------------|-----------------------|--------------|--------------------|----------------|---------------------|
|                                            |                       |                     |                    | <i>Q</i> test  | Subgroup difference |                       |              |                    | <i>Q</i> test  | Subgroup difference |                       |              |                    | <i>Q</i> test  | Subgroup difference |
|                                            |                       |                     |                    |                |                     |                       |              |                    |                |                     |                       |              |                    |                |                     |
|                                            |                       |                     |                    |                |                     |                       |              |                    |                |                     |                       |              |                    |                |                     |
| LDL-C-CV                                   |                       |                     |                    | LDL-C-SD       |                     |                       |              | LDL-C-VIM          |                |                     |                       |              |                    |                |                     |
| Yes                                        | 3                     | 1.08<br>(1.00,1.17) | 23.0               | 0.273          | 4                   | 1.07<br>(1.02,1.13)   | 59.9         | 0.058              | 3              | 1.11<br>(1.07,1.15) | 0.0                   | 0.793        |                    |                |                     |
| No                                         | 1                     | 1.90<br>(1.10,3.29) | /                  | /              | 1                   | 2.14<br>(1.26,3.62)   | /            | /                  | 1              | 2.15<br>(1.23,3.73) | /                     | /            |                    |                |                     |
| Adjusted for lipid-lowering medication     |                       |                     |                    |                | 0.136               | 0.008                 |              |                    |                |                     | 0.094                 |              |                    |                |                     |
| Yes                                        | 3                     | 1.28<br>(0.98,1.67) | 56.9               | 0.098          | 3                   | 1.30<br>(0.97,1.72)   | 70.5         | 0.034              | 2              | 1.54<br>(0.89,2.65) | 68.1                  | 0.077        |                    |                |                     |
| No                                         | 1                     | 1.06<br>(1.02,1.10) | /                  | /              | 2                   | 1.04<br>(1.00,1.07)   | 0.0          | 0.471              | 2              | 1.10<br>(1.06,1.15) | 0.0                   | 0.870        |                    |                |                     |

Note: The variables used for subgroup meta-analysis included: subtypes of CVDs, gender (male or female), whether adjusting for mean lipid level or not, whether adjusting for lipid-lowering medication or not, whether adjusting for hypertension or not, whether adjusting for diabetes or not, whether adjusting for BMI or not, and whether adjusting for smoking or not. All studies of LDL-C-CV, LDL-C-SD and LDL-C-VIM with CVDs were adjusted for hypertension, diabetes, BMI and smoking (data not shown).

SRR, summary relative risk; CI, confidence interval; CVDs, cardiovascular diseases; LDL-C, low-density lipoprotein cholesterol; CV, coefficient of variation; SD, standard deviation; VIM, variation independent of mean; MI, myocardial infarction; AF, atrial fibrillation; \*Two studies have explored the relationship between LDL-C-CV, LDL-C-SD, LDL-C-VIM and CVDs in males and females.

**Table S7.** Summary effects and 95% CI using random-effects subgroup meta-analysis for the associations of TG variability (top vs. bottom quartile) with CVDs

| Characteristics of studies and populations | Number of Data Points | SRR (95% CI)     | I <sup>2</sup> (%) | <i>p</i> value |                     | Number of Data Points | SRR (95% CI)     | I <sup>2</sup> (%) | <i>p</i> value |                     | Number of Data Points | SRR (95% CI)     | I <sup>2</sup> (%) | <i>p</i> value |                     |
|--------------------------------------------|-----------------------|------------------|--------------------|----------------|---------------------|-----------------------|------------------|--------------------|----------------|---------------------|-----------------------|------------------|--------------------|----------------|---------------------|
|                                            |                       |                  |                    | <i>Q</i> test  | Subgroup difference |                       |                  |                    | <i>Q</i> test  | Subgroup difference |                       |                  |                    | <i>Q</i> test  | Subgroup difference |
|                                            |                       |                  |                    |                |                     |                       |                  |                    |                |                     |                       |                  |                    |                |                     |
| TG-CV                                      |                       |                  |                    | TG-SD          |                     |                       |                  | TG-VIM             |                |                     |                       |                  |                    |                |                     |
| Global analysis                            | 4                     | 1.04 (0.98,1.11) |                    |                |                     | 5                     | 1.05 (1.02,1.09) |                    |                |                     | 4                     | 1.02 (0.95,1.09) |                    |                |                     |
| Subtypes of CVDs                           |                       |                  |                    |                |                     | 0.070                 |                  |                    |                |                     | 0.236                 |                  |                    |                | 0.433               |
| MI                                         | 1                     | 1.21 (0.92,1.59) | /                  | /              |                     | 1                     | 1.28 (0.92,1.79) | /                  | /              |                     | 1                     | 0.89 (0.66,1.20) | /                  | /              |                     |
| Stroke                                     | 2                     | 0.92 (0.78,1.09) | 0.0                | 0.849          |                     | 2                     | 1.08 (0.87,1.34) | 6.6                | 0.301          |                     | 2                     | 0.92 (0.78,1.08) | 0.0                | 0.693          |                     |
| AF                                         | 1                     | 1.05 (1.02,1.09) | /                  | /              |                     | 1                     | 1.04 (1.01,1.08) | /                  | /              |                     | 1                     | 1.04 (1.01,1.08) | /                  | /              |                     |
| Gender <sup>a</sup>                        |                       |                  |                    |                |                     | /                     |                  |                    |                |                     | /                     |                  |                    |                | /                   |
| Male                                       | 1                     | 1.07 (1.03,1.11) | /                  | /              |                     | 1                     | 1.07 (1.03,1.11) | /                  | /              |                     | 1                     | 1.07 (1.02,1.11) | /                  | /              |                     |
| Female                                     | 1                     | 0.99 (0.92,1.06) | /                  | /              |                     | 1                     | 0.97 (0.90,1.04) | /                  | /              |                     | 1                     | 0.98 (0.91,1.04) | /                  | /              |                     |
| Adjusted for mean lipid level              |                       |                  |                    |                |                     | 0.784                 |                  |                    |                |                     | 0.309                 |                  |                    |                | 0.410               |

| Characteristics of studies and populations | Number of Data Points | SRR (95% CI)     | I <sup>2</sup> (%) | p value |                     | Number of Data Points | SRR (95% CI) | I <sup>2</sup> (%) | p value |                     | Number of Data Points | SRR (95% CI) | I <sup>2</sup> (%) | p value |                     |
|--------------------------------------------|-----------------------|------------------|--------------------|---------|---------------------|-----------------------|--------------|--------------------|---------|---------------------|-----------------------|--------------|--------------------|---------|---------------------|
|                                            |                       |                  |                    | Q test  | Subgroup difference |                       |              |                    | Q test  | Subgroup difference |                       |              |                    | Q test  | Subgroup difference |
|                                            |                       |                  |                    |         |                     |                       |              |                    |         |                     |                       |              |                    |         |                     |
|                                            |                       |                  |                    |         |                     |                       |              |                    |         |                     |                       |              |                    |         |                     |
| TG-CV                                      |                       |                  |                    | TG-SD   |                     |                       |              | TG-VIM             |         |                     |                       |              |                    |         |                     |
| Yes                                        | 3                     | 1.04 (0.94,1.14) | 23.0               | 0.273   | 4                   | 1.05 (1.02,1.09)      | 0.0          | 0.426              | 3       | 1.01 (0.93,1.10)    | 25.9                  | 0.259        |                    |         |                     |
| No                                         | 1                     | 0.97 (0.57,1.67) | /                  | /       | 1                   | 1.42 (0.80,2.52)      | /            | /                  | 1       | 0.83 (0.49,1.41)    | /                     | /            |                    |         |                     |
| Adjusted for lipid-lowering medication     |                       |                  |                    |         | 0.450               |                       |              |                    |         |                     | 0.141                 | 0.198        |                    |         |                     |
| Yes                                        | 3                     | 1.01 (0.84,1.22) | 27.4               | 0.252   | 3                   | 1.10 (1.03,1.17)      | 0.0          | 0.441              | 2       | 0.88 (0.68,1.14)    | 0.0                   | 0.827        |                    |         |                     |
| No                                         | 1                     | 1.05 (1.02,1.09) | /                  | /       | 2                   | 1.04 (1.01,1.08)      | 0.0          | 0.905              | 2       | 1.02 (0.93,1.12)    | 40.3                  | 0.196        |                    |         |                     |

Note: The variables used for subgroup meta-analysis included: study design, subtypes of CVDs, gender (male or female), whether adjusting for mean lipid level or not, whether adjusting for lipid-lowering medication or not, whether adjusting for hypertension or not, whether adjusting for diabetes or not, whether adjusting for BMI or not, and whether adjusting for smoking or not. All studies of TG-CV, TG-SD and TG-VIM with CVDs were adjusted for hypertension, diabetes, BMI and smoking (data not shown).

SRR, summary relative risk; CI, confidence interval; CVDs, cardiovascular diseases; TG, triglycerides; CV, coefficient of variation; SD, standard deviation; VIM, variation independent of mean; MI, myocardial infarction; AF, atrial fibrillation; <sup>a</sup>One studies have explored the relationship between TG-CV, TG-SD, TG-VIM and CVDs in males and females.

**Table S8.** Summary effects and 95% CI using random-effects subgroup meta-analysis for the associations of TC variability (top vs. bottom quartile) with all-cause mortality

| Characteristics of studies and populations | Number of Data Points | SRR (95% CI)     | I <sup>2</sup> (%) | p value |                     | Number of Data Points | SRR (95% CI) | I <sup>2</sup> (%) | p value |                     | Number of Data Points | SRR (95% CI) | I <sup>2</sup> (%) | p value |                     |
|--------------------------------------------|-----------------------|------------------|--------------------|---------|---------------------|-----------------------|--------------|--------------------|---------|---------------------|-----------------------|--------------|--------------------|---------|---------------------|
|                                            |                       |                  |                    | Q test  | Subgroup difference |                       |              |                    | Q test  | Subgroup difference |                       |              |                    | Q test  | Subgroup difference |
|                                            |                       |                  |                    |         |                     |                       |              |                    |         |                     |                       |              |                    |         |                     |
| TC-CV                                      |                       |                  |                    | TC-SD   |                     |                       |              | TC-VIM             |         |                     |                       |              |                    |         |                     |
| Global analysis                            | 3                     | 1.28 (1.15,1.42) |                    |         | 3                   | 1.32 (1.22,1.44)      |              |                    |         | 3                   | 1.18 (1.09,1.27)      |              |                    |         |                     |
| Gender <sup>a</sup>                        |                       |                  |                    |         | <0.001              |                       |              |                    |         | /                   |                       |              |                    |         | /                   |
| Male                                       | 2                     | 1.27 (1.25,1.29) | 0.0                | 0.863   | 1                   | 1.26 (1.24,1.28)      | /            | /                  |         | 1                   | 1.26 (1.24,1.28)      | /            | /                  |         |                     |
| Female                                     | 2                     | 1.08 (1.05,1.11) | 0.0                | 0.857   | 1                   | 1.08 (1.05,1.12)      | /            | /                  |         | 1                   | 1.08 (1.05,1.11)      | /            | /                  |         |                     |
| Adjusted for diabetes                      |                       |                  |                    |         | 0.603               |                       |              |                    |         | 0.263               |                       |              |                    |         | 0.205               |
| Yes                                        | 2                     | 1.30 (1.14,1.49) | 76.5               | 0.039   | 2                   | 1.36 (1.25,1.48)      | 42.5         | 0.187              |         | 2                   | 1.35 (1.28,1.41)      | 0.0          | 0.357              |         |                     |
| No                                         | 1                     | 1.21 (1.05,1.40) | /                  | /       | 1                   | 1.22 (1.05,1.41)      | /            | /                  |         | 1                   | 1.22 (1.06,1.41)      | /            | /                  |         |                     |
| Adjusted for lipid-lowering medication     |                       |                  |                    |         | 0.603               |                       |              |                    |         | 0.263               |                       |              |                    |         | 0.205               |

| Characteristics of studies and populations | Number of Data Points | SRR (95% CI)        | I <sup>2</sup> (%) | p value |                     | Number of Data Points | SRR (95% CI) | I <sup>2</sup> (%) | p value |                     | Number of Data Points | SRR (95% CI) | I <sup>2</sup> (%) | p value |                     |
|--------------------------------------------|-----------------------|---------------------|--------------------|---------|---------------------|-----------------------|--------------|--------------------|---------|---------------------|-----------------------|--------------|--------------------|---------|---------------------|
|                                            |                       |                     |                    | Q test  | Subgroup difference |                       |              |                    | Q test  | Subgroup difference |                       |              |                    | Q test  | Subgroup difference |
|                                            |                       |                     |                    |         |                     |                       |              |                    |         |                     |                       |              |                    |         |                     |
|                                            |                       |                     |                    |         |                     |                       |              |                    |         |                     |                       |              |                    |         |                     |
| TC-CV                                      |                       |                     |                    | TC-SD   |                     |                       |              | TC-VIM             |         |                     |                       |              |                    |         |                     |
| Yes                                        | 2                     | 1.30<br>(1.14,1.49) | 76.5               | 0.039   | 2                   | 1.36<br>(1.25,1.48)   | 42.5         | 0.187              | 2       | 1.35<br>(1.28,1.41) | 0.0                   | 0.357        |                    |         |                     |
| No                                         | 1                     | 1.21<br>(1.05,1.40) | /                  | /       | 1                   | 1.22<br>(1.05,1.41)   | /            | /                  | 1       | 1.22<br>(1.06,1.41) | /                     | /            |                    |         |                     |

Note: The variables used for subgroup meta-analysis included: subtypes of CVDs, gender (male or female), whether adjusting for mean lipid level or not, whether adjusting for lipid-lowering medication or not, whether adjusting for hypertension or not, whether adjusting for diabetes or not, whether adjusting for BMI or not, and whether adjusting for smoking or not. All studies of TC-CV, TC-SD, TC-VIM with all-cause mortality were adjusted for mean lipid level, hypertension, BMI and smoking (data not shown).

SRR, summary relative risk; CI, confidence interval; TC, total cholesterol; TC-CV, coefficient of variation of TC; TC-SD, standard deviation of TC; TC-VIM, variation independent of mean of TC; <sup>a</sup>Two studies have explored the relationships between TC-CV and all-cause mortality in males and females; One study have explored the relationship of TC-SD and TC-VIM with all-cause mortality in males and females

# TC

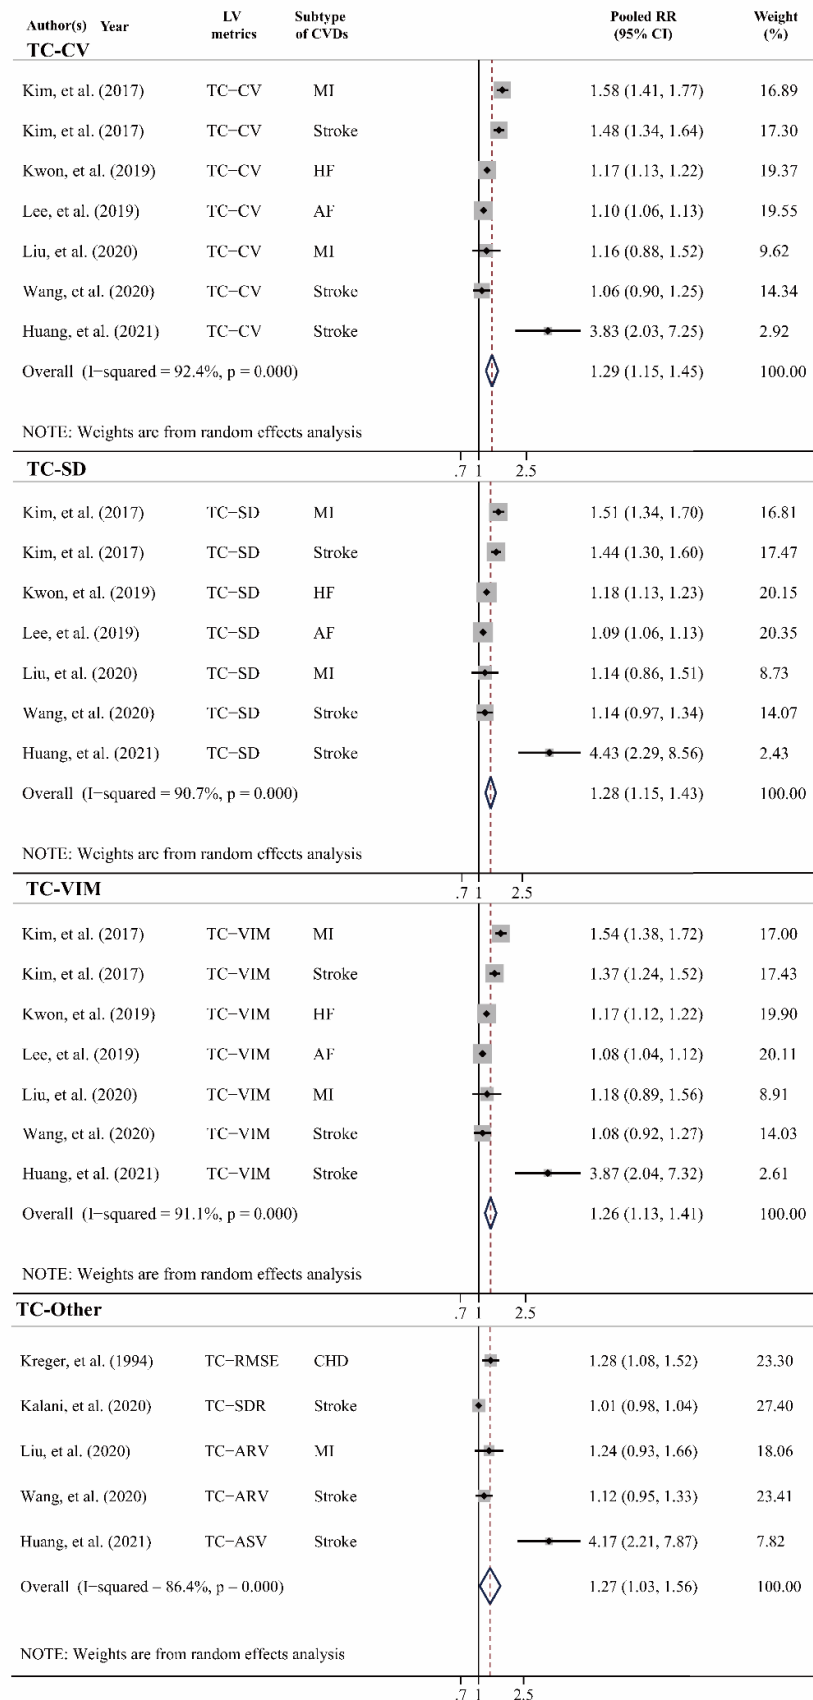

**Figure S1.** Forest plots of standardized RRs for different types and metrics of TC variability (top vs. bottom quartile) with CVDs

Notes: CVDs, cardiovascular diseases; RR, relative risk; CI, confidence interval; TC, total cholesterol; TC-CV, coefficient of variation of TC; TC-SD, standard deviation of TC; TC-VIM, variation independent of mean of TC; TC-Other included average real variability of TC (TC-ARV), standard deviation of the residuals of TC (TC-SDR) and root mean square error of TC (TC-RMSE); MI, myocardial infarction; AF, atrial fibrillation; HF, heart failure; CHD, coronary heart disease.

# HDL-C

| Author(s) Year                         | LV metrics | Subtype of CVDs |  | Pooled RR (95% CI) | Weight (%) |
|----------------------------------------|------------|-----------------|--|--------------------|------------|
| <b>HDL-C-CV</b>                        |            |                 |  |                    |            |
| Lee, et al. (2019)                     | HDL-C-CV   | AF              |  | 1.06 (1.03, 1.10)  | 28.82      |
| Han, et al. (2020)                     | HDL-C-CV   | MI              |  | 1.13 (1.10, 1.16)  | 31.55      |
| Han, et al. (2020)                     | HDL-C-CV   | Stroke          |  | 1.11 (1.09, 1.14)  | 33.09      |
| Liu, et al. (2020)                     | HDL-C-CV   | MI              |  | 1.56 (1.17, 2.08)  | 1.59       |
| Wang, et al. (2020)                    | HDL-C-CV   | Stroke          |  | 1.18 (1.00, 1.39)  | 4.48       |
| Huang, et al. (2021)                   | HDL-C-CV   | Stroke          |  | 1.39 (0.81, 2.38)  | 0.47       |
| Overall (I-squared = 67.2%, p = 0.009) |            |                 |  | 1.11 (1.07, 1.15)  | 100.00     |

NOTE: Weights are from random effects analysis

|                                        |          |        |  |                   |        |
|----------------------------------------|----------|--------|--|-------------------|--------|
| <b>HDL-C-SD</b>                        |          |        |  |                   |        |
| Lee, et al. (2019)                     | HDL-C-SD | AF     |  | 1.06 (1.02, 1.10) | 47.06  |
| Liu, et al. (2020)                     | HDL-C-SD | MI     |  | 1.46 (1.08, 1.97) | 16.59  |
| Wang, et al. (2020)                    | HDL-C-SD | Stroke |  | 1.21 (1.03, 1.43) | 30.39  |
| Huang, et al. (2021)                   | HDL-C-SD | Stroke |  | 1.42 (0.80, 2.52) | 5.96   |
| Overall (I-squared = 60.1%, p = 0.057) |          |        |  | 1.18 (1.02, 1.38) | 100.00 |

NOTE: Weights are from random effects analysis

|                                        |           |        |  |                   |        |
|----------------------------------------|-----------|--------|--|-------------------|--------|
| <b>HDL-C-VIM</b>                       |           |        |  |                   |        |
| Lee, et al. (2019)                     | HDL-C-VIM | AF     |  | 1.07 (1.03, 1.11) | 26.35  |
| Han, et al. (2020)                     | HDL-C-VIM | MI     |  | 1.26 (1.23, 1.30) | 26.96  |
| Han, et al. (2020)                     | HDL-C-VIM | Stroke |  | 1.14 (1.12, 1.17) | 27.33  |
| Liu, et al. (2020)                     | HDL-C-VIM | MI     |  | 1.36 (1.02, 1.82) | 5.51   |
| Wang, et al. (2020)                    | HDL-C-VIM | Stroke |  | 1.21 (1.03, 1.43) | 12.00  |
| Huang, et al. (2021)                   | HDL-C-VIM | Stroke |  | 1.62 (0.94, 2.77) | 1.85   |
| Overall (I-squared = 91.6%, p = 0.000) |           |        |  | 1.18 (1.09, 1.27) | 100.00 |

NOTE: Weights are from random effects analysis

|                                       |           |        |  |                   |        |
|---------------------------------------|-----------|--------|--|-------------------|--------|
| <b>HDL-C-Other</b>                    |           |        |  |                   |        |
| Han, et al. (2020)                    | HDL-C-ARV | MI     |  | 1.05 (1.02, 1.08) | 38.78  |
| Han, et al. (2020)                    | HDL-C-ARV | Stroke |  | 1.08 (1.06, 1.11) | 59.64  |
| Liu, et al. (2020)                    | HDL-C-ARV | MI     |  | 1.17 (0.87, 1.57) | 0.37   |
| Wang, et al. (2020)                   | HDL-C-ARV | Stroke |  | 1.08 (0.91, 1.28) | 1.09   |
| Huang, et al. (2021)                  | HDL-C-ASV | Stroke |  | 1.33 (0.79, 2.24) | 0.12   |
| Overall (I-squared = 0.0%, p = 0.501) |           |        |  | 1.07 (1.05, 1.09) | 100.00 |

NOTE: Weights are from random effects analysis

.7 1 2.5



**Figure S2.** Forest plots of standardized RRs for different types and metrics of HDL-C variability (top vs. bottom quartile) and CVDs

Notes: CVDs, cardiovascular diseases; RR, relative risk; CI, confidence interval; HDL-C, high-density lipoprotein cholesterol; HDL-C-CV, coefficient of variation of HDL-C; HDL-C-SD, standard deviation of HDL-C; HDL-C-VIM, variation independent of mean of HDL-C; HDL-C-Other included average real variability of HDL-C (HDL-C-ARV); MI, myocardial infarction; AF, atrial fibrillation.

# LDL-C

| Author(s)                              | Year | LV metrics | Subtype of CVDs | Pooled RR (95% CI) | Weight (%) |
|----------------------------------------|------|------------|-----------------|--------------------|------------|
| <b>LDL-C-CV</b>                        |      |            |                 |                    |            |
| Lee, et al. (2019)                     |      | LDL-C-CV   | AF              | 1.06 (1.02, 1.10)  | 48.42      |
| Liu, et al. (2020)                     |      | LDL-C-CV   | MI              | 1.34 (1.01, 1.78)  | 16.86      |
| Wang, et al. (2020)                    |      | LDL-C-CV   | Stroke          | 1.08 (0.91, 1.29)  | 28.71      |
| Huang, et al. (2021)                   |      | LDL-C-CV   | Stroke          | 1.90 (1.10, 3.29)  | 6.01       |
| Overall (I-squared = 56.3%, p = 0.076) |      |            |                 | 1.15 (0.99, 1.33)  | 100.00     |

NOTE: Weights are from random effects analysis

|                                        |  |          |        |                   |        |
|----------------------------------------|--|----------|--------|-------------------|--------|
| <b>LDL-C-SD</b>                        |  |          |        | .7 1 2.5          |        |
| Lee, et al. (2019)                     |  | LDL-C-SD | AF     | 1.03 (1.00, 1.07) | 40.49  |
| Liu, et al. (2020)                     |  | LDL-C-SD | MI     | 1.25 (0.93, 1.69) | 5.05   |
| Wang, et al. (2020)                    |  | LDL-C-SD | Stroke | 1.10 (0.93, 1.30) | 12.87  |
| Wan, et al. (2020)                     |  | LDL-C-SD | CVD    | 1.10 (1.06, 1.14) | 39.83  |
| Huang, et al. (2021)                   |  | LDL-C-SD | Stroke | 2.14 (1.26, 3.62) | 1.76   |
| Overall (I-squared = 71.9%, p = 0.007) |  |          |        | 1.09 (1.02, 1.17) | 100.00 |

NOTE: Weights are from random effects analysis

|                                        |  |           |        |                   |        |
|----------------------------------------|--|-----------|--------|-------------------|--------|
| <b>LDL-C-VIM</b>                       |  |           |        | .7 1 2.5          |        |
| Lee, et al. (2019)                     |  | LDL-C-VIM | AF     | 1.10 (1.06, 1.15) | 52.05  |
| Liu, et al. (2020)                     |  | LDL-C-VIM | MI     | 1.22 (0.91, 1.63) | 14.50  |
| Wang, et al. (2020)                    |  | LDL-C-VIM | Stroke | 1.12 (0.95, 1.33) | 28.44  |
| Huang, et al. (2021)                   |  | LDL-C-VIM | Stroke | 2.15 (1.23, 3.73) | 5.01   |
| Overall (I-squared = 49.7%, p = 0.114) |  |           |        | 1.16 (1.02, 1.32) | 100.00 |

NOTE: Weights are from random effects analysis

|                                        |  |           |        |                   |        |
|----------------------------------------|--|-----------|--------|-------------------|--------|
| <b>LDL-C-Other</b>                     |  |           |        | .7 1 2.5          |        |
| Liu, et al. (2020)                     |  | LDL-C-ARV | MI     | 1.38 (1.02, 1.87) | 35.09  |
| Wang, et al. (2020)                    |  | LDL-C-ARV | Stroke | 1.02 (0.86, 1.21) | 39.11  |
| Huang, et al. (2021)                   |  | LDL-C-ASV | Stroke | 2.81 (1.61, 4.92) | 25.80  |
| Overall (I-squared = 84.8%, p = 0.001) |  |           |        | 1.47 (0.93, 2.34) | 100.00 |

NOTE: Weights are from random effects analysis

.7 1 2.5

**Figure S3.** Forest plots of standardized RRs for different types and metrics of LDL-C variability (top vs. bottom quartile) and CVDs

Notes: CVDs, cardiovascular diseases; RR, relative risk; CI, confidence interval; LDL-C, low-density lipoprotein cholesterol; LDL-C-CV, coefficient of variation of LDL-C; LDL-C-SD, standard deviation of LDL-C; LDL-C-VIM, variation independent of mean of LDL-C; LDL-C-Other included average real variability of LDL-C (LDL-C-ARV); MI, myocardial infarction; AF, atrial fibrillation.

# TG

| Author(s)                             | Year | LV metrics | Subtype of CVDs |  | Pooled RR (95% CI) | Weight (%) |
|---------------------------------------|------|------------|-----------------|--|--------------------|------------|
| <b>TG-CV</b>                          |      |            |                 |  |                    |            |
| Lee, et al. (2019)                    |      | TG-CV      | AF              |  | 1.05 (1.02, 1.09)  | 82.94      |
| Liu, et al. (2020)                    |      | TG-CV      | MI              |  | 1.21 (0.92, 1.59)  | 4.74       |
| Wang, et al. (2020)                   |      | TG-CV      | Stroke          |  | 0.92 (0.77, 1.09)  | 11.06      |
| Huang, et al. (2021)                  |      | TG-CV      | Stroke          |  | 0.97 (0.57, 1.67)  | 1.26       |
| Overall (I-squared = 9.7%, p = 0.344) |      |            |                 |  | 1.04 (0.98, 1.11)  | 100.00     |

NOTE: Weights are from random effects analysis

|                                       |  |       |        |    |                   |        |
|---------------------------------------|--|-------|--------|----|-------------------|--------|
| <b>TG-SD</b>                          |  |       |        | .7 | 1                 | 2.5    |
| Lee, et al. (2019)                    |  | TG-SD | AF     |    | 1.04 (1.01, 1.08) | 76.17  |
| Liu, et al. (2020)                    |  | TG-SD | MI     |    | 1.28 (0.92, 1.79) | 0.77   |
| Wang, et al. (2020)                   |  | TG-SD | Stroke |    | 1.03 (0.84, 1.26) | 2.08   |
| Wan, et al. (2020)                    |  | TG-SD | CVD    |    | 1.09 (1.02, 1.16) | 20.72  |
| Huang, et al. (2021)                  |  | TG-SD | Stroke |    | 1.42 (0.80, 2.52) | 0.26   |
| Overall (I-squared = 0.0%, p = 0.431) |  |       |        |    | 1.05 (1.02, 1.09) | 100.00 |

NOTE: Weights are from random effects analysis

|                                        |  |        |        |    |                   |        |
|----------------------------------------|--|--------|--------|----|-------------------|--------|
| <b>TG-VIM</b>                          |  |        |        | .7 | 1                 | 2.5    |
| Lee, et al. (2019)                     |  | TG-VIM | AF     |    | 1.04 (1.01, 1.08) | 81.44  |
| Liu, et al. (2020)                     |  | TG-VIM | MI     |    | 0.89 (0.66, 1.20) | 4.51   |
| Wang, et al. (2020)                    |  | TG-VIM | Stroke |    | 0.93 (0.78, 1.10) | 12.54  |
| Huang, et al. (2021)                   |  | TG-VIM | Stroke |    | 0.83 (0.49, 1.41) | 1.51   |
| Overall (I-squared = 11.2%, p = 0.337) |  |        |        |    | 1.02 (0.95, 1.09) | 100.00 |

NOTE: Weights are from random effects analysis

|                                       |  |        |        |    |                   |        |
|---------------------------------------|--|--------|--------|----|-------------------|--------|
| <b>TG-Other</b>                       |  |        |        | .7 | 1                 | 2.5    |
| Liu, et al. (2020)                    |  | TG-ARV | MI     |    | 1.30 (0.93, 1.82) | 24.03  |
| Wang, et al. (2020)                   |  | TG-ARV | Stroke |    | 1.05 (0.86, 1.28) | 68.50  |
| Huang, et al. (2021)                  |  | TG-ASV | Stroke |    | 1.38 (0.76, 2.53) | 7.47   |
| Overall (I-squared = 0.0%, p = 0.444) |  |        |        |    | 1.13 (0.96, 1.33) | 100.00 |

NOTE: Weights are from random effects analysis

.7 1 2.5

**Figure S4.** Forest plots of standardized RRs for different types and metrics of TG variability (top vs. bottom quartile) and CVDs

Notes: CVDs, cardiovascular diseases; RR, relative risk; CI, confidence interval; TG, triglycerides; TG-CV, coefficient of variation of TG; TG-SD, standard deviation of TG; TG-VIM, variation independent of mean of TG; TG-Other included average real variability of TG (TG-ARV); MI, myocardial infarction; AF, atrial fibrillation.

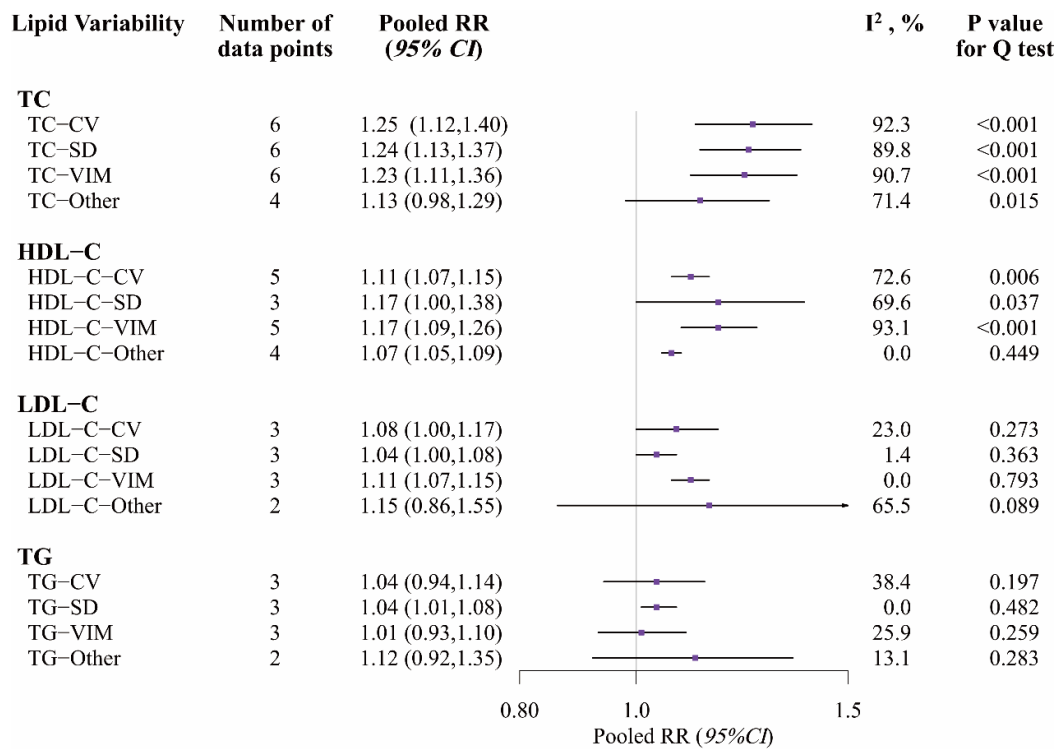

**Figure S5.** Sensitivity analysis of standardized RRs for different types and metrics of LV (top vs. bottom quartile) and CVDs with excluding the articles counted on patients with hypertension or diabetes

Notes: LV, lipid variability; CVDs, cardiovascular diseases; TC, total cholesterol; HDL-C, high-density lipoprotein cholesterol; LDL-C, low-density lipoprotein cholesterol; TG, triglycerides; CV, coefficient of variation; SD, standard deviation; VIM, variation independent of mean; TC-Other included average real variability of TC (TC-ARV), standard deviation of the residuals of TC (TC-SDR) and root mean square error of TC (TC-RMSE); HDL-C-Other included average real variability of HDL-C (HDL-C-ARV); LDL-C-Other included average real variability of LDL-C (LDL-C-ARV); TG-Other included average real variability of TG (TG-ARV).

# TC

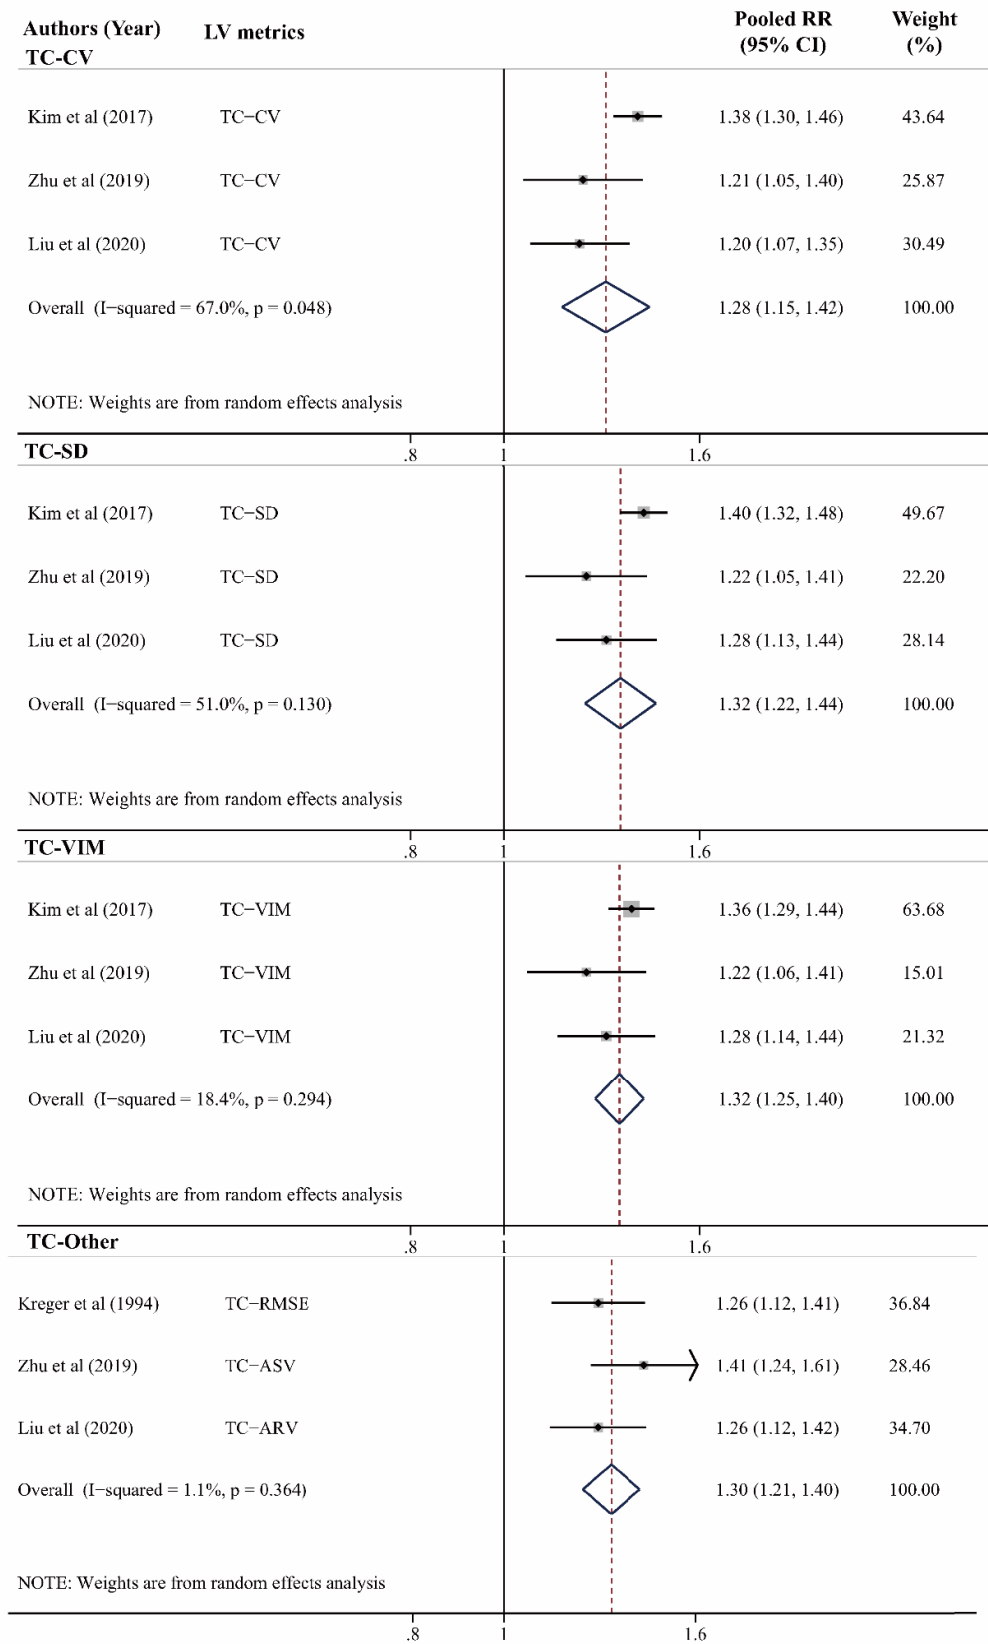

**Figure S6.** Forest plots of standardized RRs for different types and metrics of TC variability (top vs. bottom quartile) and all-cause mortality

Notes: LV, lipid variability; RR, relative risk; CI, confidence interval; TC, total cholesterol; TC-CV, coefficient of variation of TC; TC-SD, standard deviation of TC; TC-VIM, variation independent of mean of TC; TC-Other included average real variability of TC (TC-ARV), average successive variability of TC (TC-ASV) and root mean square error of TC (TC-RMSE).



## HDL-C

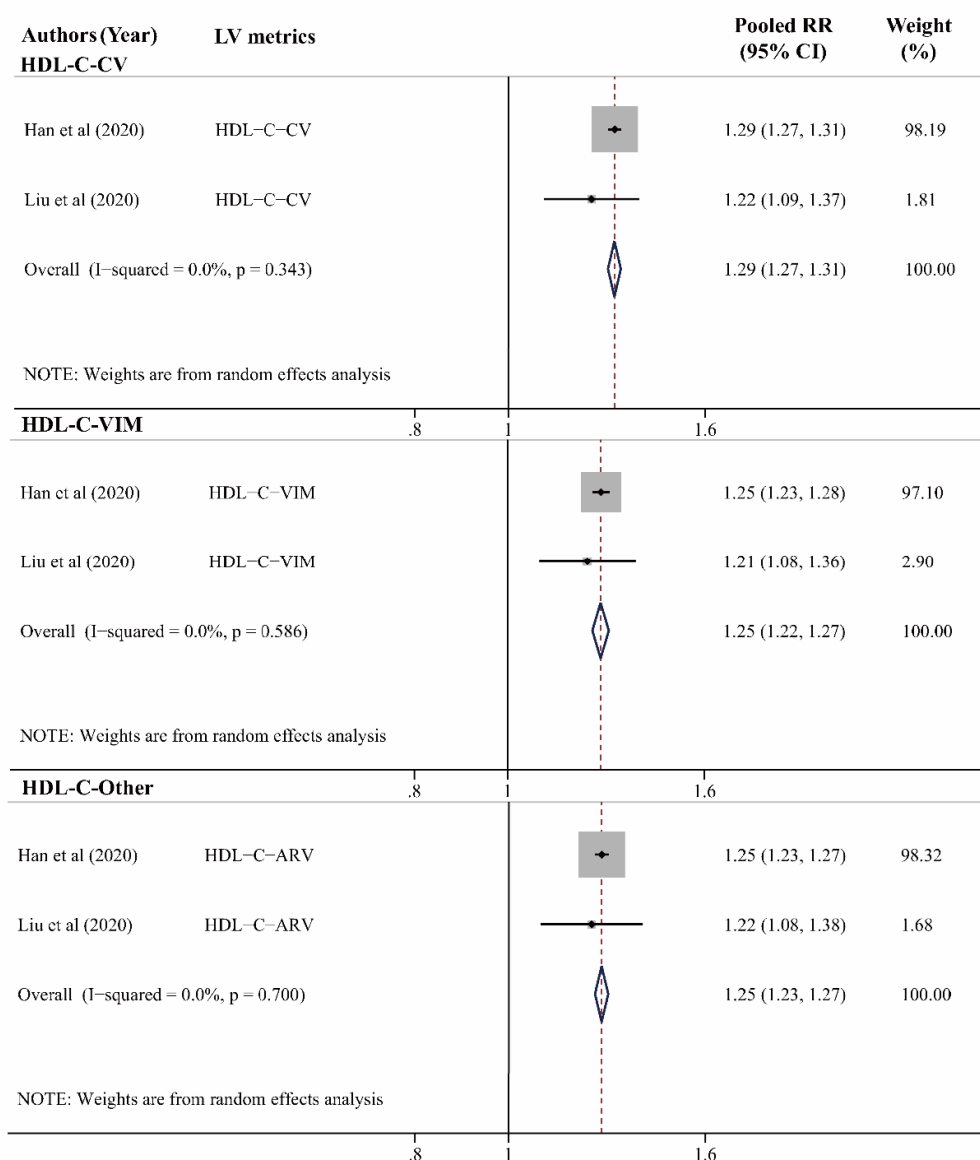

**Figure S7.** Forest plots of standardized RRs for different types and metrics of HDL-C variability (top vs. bottom quartile) and all-cause mortality

Notes: LV, lipid variability; RR, relative risk; CI, confidence interval; HDL-C, high-density lipoprotein cholesterol; HDL-C-CV, coefficient of variation of HDL-C; HDL-C-SD, standard deviation of HDL-C; HDL-C-VIM, variation independent of mean of HDL-C; HDL-C-Other included average real variability of HDL-C (HDL-C-ARV).

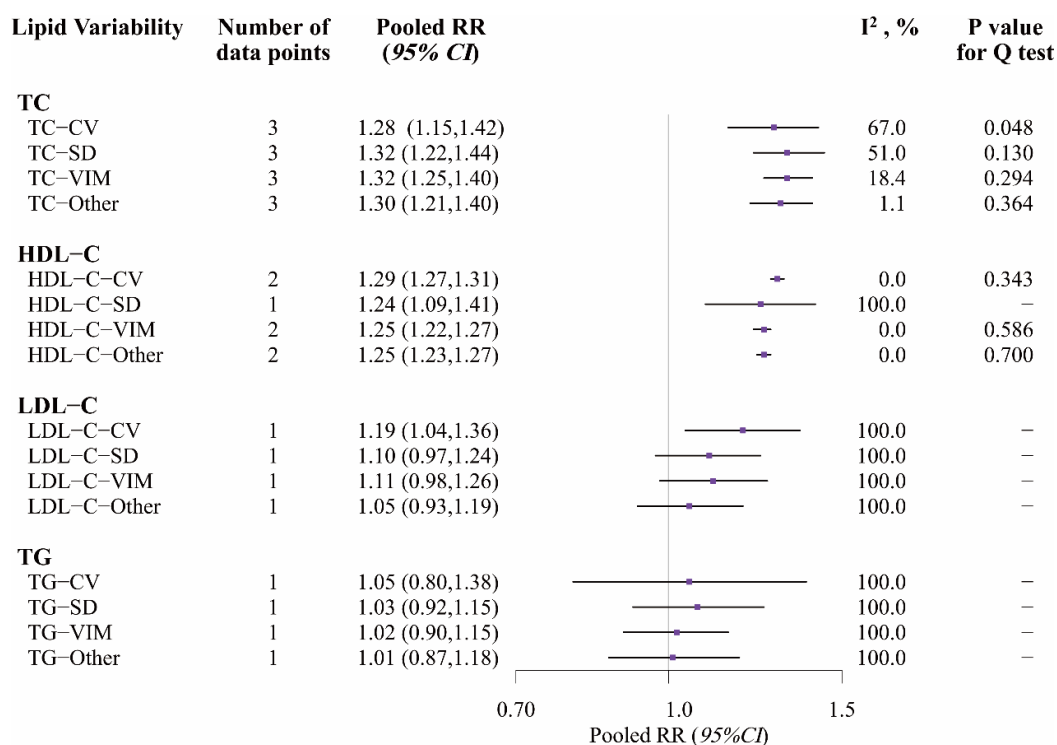

**Figure S8.** Sensitivity analysis of standardized RRs for different types and metrics of LV (top vs. bottom quartile) and all-cause mortality with excluding the articles counted on patients with hypertension or diabetes

Notes: LV, lipid variability; TC, total cholesterol; HDL-C, high-density lipoprotein cholesterol; LDL-C, low-density lipoprotein cholesterol; TG, triglycerides; CV, coefficient of variation; SD, standard deviation; VIM, variation independent of mean; TC-Other included average real variability of TC (TC-ARV), average successive variability of TC (TC-ASV) and root mean square error of TC (TC-RMSE); HDL-C-Other included average real variability of HDL-C (HDL-C-ARV); LDL-C-Other included average real variability of LDL-C (LDL-C-ARV); TG-Other included average real variability of TG (TG-ARV).

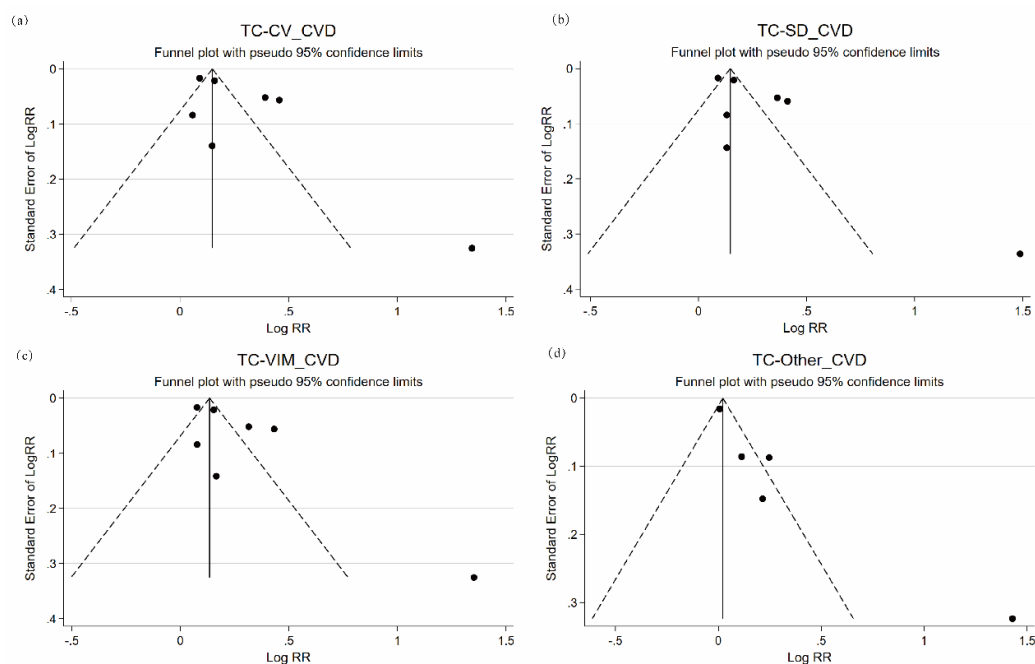

**Figure S9.** Funnel plots of standardized RRs for different types and metrics of TC variability (top vs. bottom quartile) and CVDs

Notes: CVDs, cardiovascular diseases; RR, relative risk; TC, total cholesterol; (a) TC-CV, coefficient of variation of TC; (b) TC-SD, standard deviation of TC; (c) TC-VIM, variation independent of mean of TC; (d) TC-Other included average real variability of TC (TC-ARV), standard deviation of the residuals of TC (TC-SDR) and root mean square error of TC (TC-RMSE).

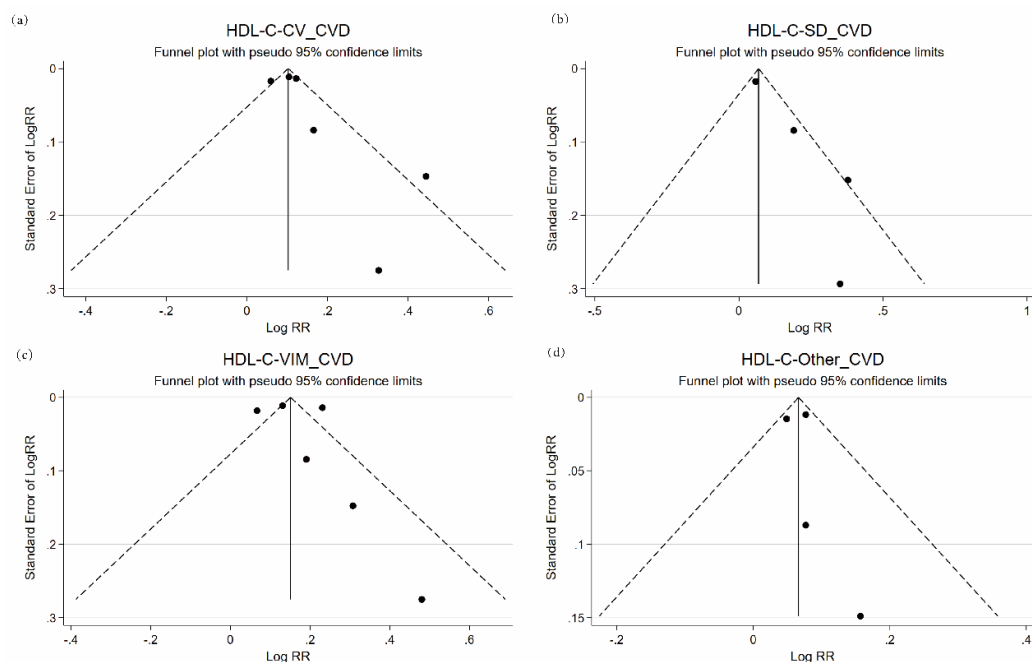

**Figure S10.** Funnel plots of standardized RRs for different types and metrics of HDL-C variability (top vs. bottom quartile) and CVDs

Notes: CVDs, cardiovascular diseases; RR, relative risk; HDL-C, high-density lipoprotein cholesterol; (a) HDL-C-CV, coefficient of variation of HDL-C; (b) HDL-C-SD, standard deviation of HDL-C; (c) HDL-C-VIM, variation independent of mean of HDL-C; (d) HDL-C-Other included average real variability of HDL-C (HDL-C-ARV).

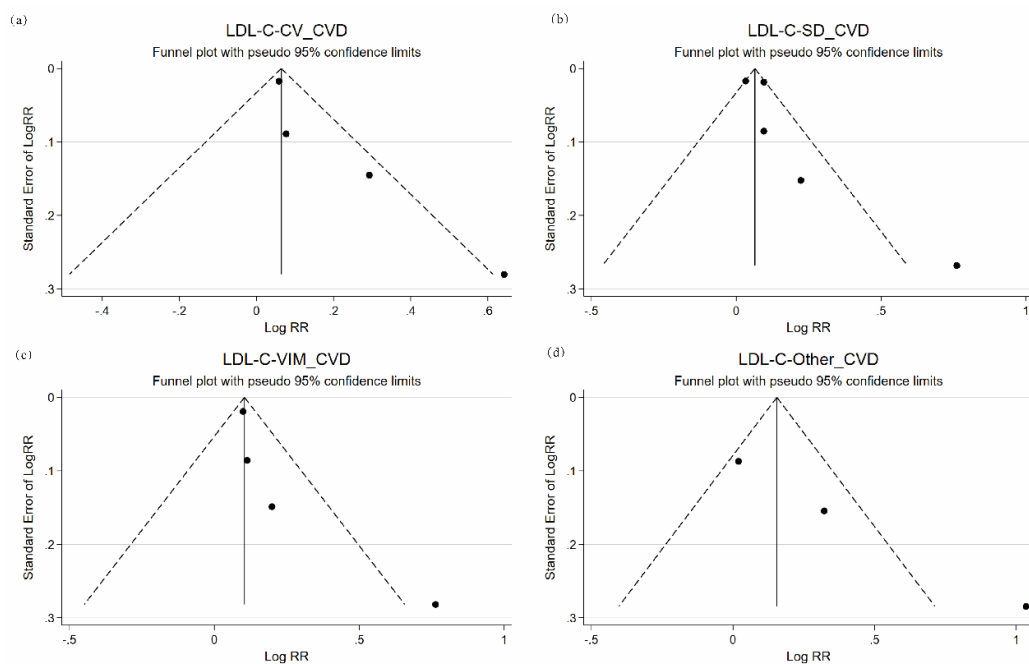

**Figure S11.** Funnel plots of standardized RRs for different types and metrics of LDL-C variability (top vs. bottom quartile) and CVDs

Notes: CVDs, cardiovascular diseases; RR, relative risk; LDL-C, low-density lipoprotein cholesterol; (a) LDL-C-CV, coefficient of variation of LDL-C; (b) LDL-C-SD, standard deviation of LDL-C; (c) LDL-C-VIM, variation independent of mean of LDL-C; (d) LDL-C-Other included average real variability of LDL-C (LDL-C-ARV).

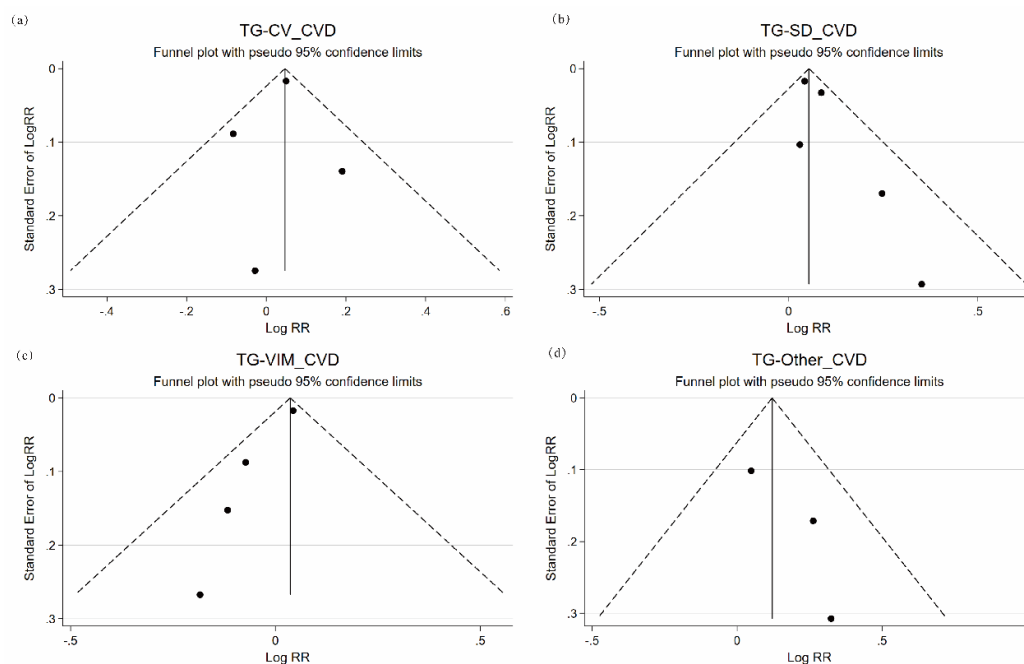

**Figure S12.** Funnel plots of standardized RRs for different types and metrics of TG variability (top vs. bottom quartile) and CVDs

Notes: CVDs, cardiovascular diseases; RR, relative risk; TG, triglycerides; (a) TG-CV, coefficient of variation of TG; (b) TG-SD, standard deviation of TG; (c) TG-VIM, variation independent of mean of TG; (d) TG-Other included average real variability of TG (TG-ARV).

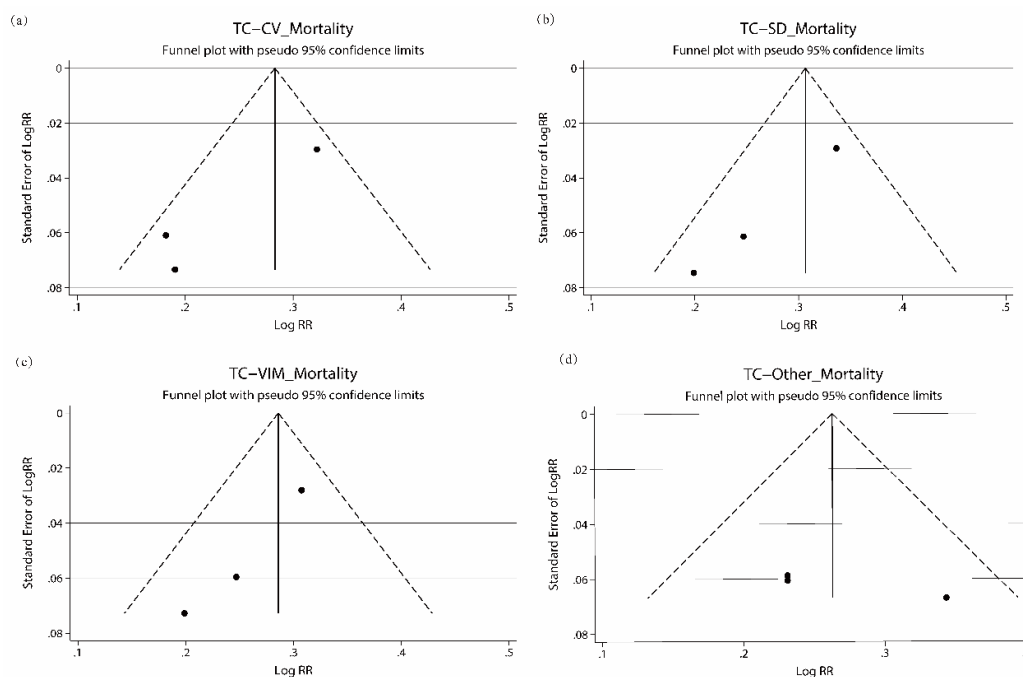

**Figure S13.** Funnel plots of standardized RRs for different types and metrics of TC variability (top vs. bottom quartile) and all-cause mortality

Notes: CVDs, cardiovascular diseases; RR, relative risk; TC, total cholesterol; (a) TC-CV, coefficient of variation of TC; (b) TC-SD, standard deviation of TC; (c) TC-VIM, variation independent of mean of TC; (d) TC-Other included average real variability of TC (TC-ARV), average successive variability of TC (TC-ASV) and root mean square error of TC (TC-RMSE).

## Reference

1. Kreger, B.E.; Odell, P.M.; D'Agostino, R.B.; Wilson, P.F. Long-term intraindividual cholesterol variability: natural course and adverse impact on morbidity and mortality--the Framingham Study. *American heart journal* **1994**, *127*, 1607-1614.
2. Kim, M.K.; Han, K.; Kim, H.S.; Park, Y.M.; Kwon, H.S.; Yoon, K.H.; Lee, S.H. Cholesterol variability and the risk of mortality, myocardial infarction, and stroke: a nationwide population-based study. *European heart journal* **2017**, *38*, 3560-3566.
3. Kwon, S.; Lee, S.R.; Choi, E.K.; Lee, S.H.; Han, K.D.; Lee, S.Y.; Yang, S.; Park, J.; Choi, Y.J.; Lee, H.J., et al. Visit-to-visit variability of metabolic parameters and risk of heart failure: A nationwide population-based study. *International journal of cardiology* **2019**.
4. Zhu, Y.; Lu, J.M.; Yu, Z.B.; Li, D.; Wu, M.Y.; Shen, P.; Lin, H.B.; Wang, J.B.; Chen, K. Intra-individual variability of total cholesterol is associated with cardiovascular disease mortality: A cohort study. *Nutrition, metabolism, and cardiovascular diseases : NMCD* **2019**, *29*, 1205-1213.
5. Lee, H.J.; Lee, S.R.; Choi, E.K.; Han, K.D.; Oh, S. Low Lipid Levels and High Variability are Associated With the Risk of New-Onset Atrial Fibrillation. *Journal of the American Heart Association* **2019**, *8*, e01277.
6. Liu, X.; Wu, S.; Song, Q.; Wang, X. Visit-to-visit variability of lipid measurements and the risk of myocardial infarction and all-cause mortality: A prospective cohort study. *Atherosclerosis* **2020**, *312*, 110-116.
7. Han, B.H.; Han, K.; Yoon, K.H.; Kim, M.K.; Lee, S.H. Impact of Mean and Variability of High-Density Lipoprotein-Cholesterol on the Risk of Myocardial Infarction, Stroke, and Mortality in the General Population. *Journal of the American Heart Association* **2020**, *9*, e015493.
8. Kalani, R.; Bartz, T.M.; Suchy-Dicey, A.; Elkind, M.S.V.; Psaty, B.M.; Leung, L.Y.; Rice, K.; Tirschwell, D.; Longstreth, W.T., Jr. Cholesterol Variability and Cranial Magnetic Resonance Imaging Findings in Older Adults: The Cardiovascular Health Study. *Stroke* **2020**, *51*, 69-74.
9. Wang, A.; Li, H.; Yuan, J.; Zuo, Y.; Zhang, Y.; Chen, S.; Wu, S.; Wang, Y. Visit-to-Visit Variability of Lipids Measurements and the Risk of Stroke and Stroke Types: A Prospective Cohort Study. *Journal of stroke* **2020**, *22*, 119-129.
10. Wan, E.Y.F.; Yu, E.Y.T.; Chin, W.Y.; Barrett, J.K.; Mok, A.H.Y.; Lau, C.S.T.; Wang, Y.; Wong, I.C.K.; Chan, E.W.Y.; Lam, C.L.K. Greater variability in lipid measurements associated with cardiovascular disease and mortality: A 10-year diabetes cohort study. *Diabetes, obesity & metabolism* **2020**, *22*, 1777-1788.
11. Huang, Y.Q.; Liu, L.; Liu, X.C.; Lo, K.; Tang, S.T.; Feng, Y.Q.; Zhang, B. The association of blood lipid parameters variability with ischemic stroke in hypertensive patients. *Nutrition, metabolism, and cardiovascular diseases : NMCD* **2021**, *31*, 1521-1532.
